# Supplementary material for: Marinoterpins A–C: Rare Linear Merosesterterpenoids from Marine-Derived Actinomycete Bacteria of the Family Streptomycetaceae
Source: PubMed Central journal article supplement — J Org Chem. 2021 Apr 12;86(16):11140–8. doi: 10.1021/acs.joc.1c00262 (PMC8383307; doi:10.1021/acs.joc.1c00262), 2021-04-12
Supplement: jo1c00262_si_001.pdf [file jo1c00262_si_001.pdf]

## Supporting Information

### **Marinoterpins A–C, Rare Linear Merosesterterpenoids from Marine-Derived Actinomycete Bacteria of the Family Streptomycetaceae**

Min Cheol Kim,<sup>†</sup> Jaclyn M. Winter,<sup>\*,‡</sup> Ratnakar N. Asolkar,<sup>†</sup> Chollaratt Boonlarpradab,<sup>†</sup> Reiko Cullum,<sup>†</sup> and William Fenical<sup>\*,†,§</sup>

<sup>†</sup> Center for Marine Biotechnology and Biomedicine, Scripps Institution of Oceanography, University of California, San Diego, La Jolla, CA 92093, USA,

<sup>‡</sup> Department of Medicinal Chemistry, University of Utah, Salt Lake City, Utah 84112, USA,

<sup>§</sup> Skaggs School of Pharmacy and Pharmaceutical Science, University of California, San Diego, La Jolla, CA, 92093, USA

#### Corresponding Authors

William Fenical

[wfenical@ucsd.edu](mailto:wfenical@ucsd.edu)

Phone: 858-534-2133

Jaclyn M. Winter

[Jaclyn.winter@utah.edu](mailto:Jaclyn.winter@utah.edu)

Phone: 801-585-7117

## Table of Contents

|                                                                                                                                              |     |
|----------------------------------------------------------------------------------------------------------------------------------------------|-----|
| <b>Table S1.</b> 2D COSY, HMBC, and ROESY NMR data of marinoterpin A ( <b>1</b> ) (CD <sub>3</sub> OD, 500 MHz).....                         | S3  |
| <b>Table S2.</b> 2D COSY, HMBC, and NOESY NMR data of marinoterpin B ( <b>2</b> ) (CD <sub>3</sub> OD, 500 MHz).....                         | S4  |
| <b>Table S3.</b> 2D COSY, HMBC, and ROESY NMR data of marinoterpin C ( <b>3</b> ) (CD <sub>3</sub> OD, 500 MHz).....                         | S5  |
| <b>Figure S1.</b> <sup>1</sup> H NMR spectrum of marinoterpin A ( <b>1</b> ) (500 MHz) in CD <sub>3</sub> OD.....                            | S6  |
| <b>Figure S2.</b> <sup>13</sup> C NMR spectrum of marinoterpin A ( <b>1</b> ) (125 MHz) in CD <sub>3</sub> OD.....                           | S7  |
| <b>Figure S3.</b> <sup>1</sup> H- <sup>1</sup> H COSY spectrum of marinoterpin A ( <b>1</b> ) (500 MHz) in CD <sub>3</sub> OD.....           | S8  |
| <b>Figure S4.</b> HSQC spectrum of marinoterpin A ( <b>1</b> ) (500 MHz) in CD <sub>3</sub> OD.....                                          | S9  |
| <b>Figure S5.</b> HMBC spectrum of marinoterpin A ( <b>1</b> ) (500 MHz) in CD <sub>3</sub> OD.....                                          | S10 |
| <b>Figure S6.</b> ROESY spectrum of marinoterpin A ( <b>1</b> ) (500 MHz) in CD <sub>3</sub> OD.....                                         | S11 |
| <b>Figure S7.</b> Homo 2D <i>J</i> -resolved <sup>1</sup> H NMR spectrum of marinoterpin A ( <b>1</b> ) (500 MHz) in CD <sub>3</sub> OD..... | S12 |
| <b>Figure S8.</b> HR-ESI-TOFMS spectrum of marinoterpin A ( <b>1</b> ).....                                                                  | S13 |
| <b>Figure S9.</b> <sup>1</sup> H NMR spectrum of marinoterpin B ( <b>2</b> ) (500 MHz) in CD <sub>3</sub> OD.....                            | S14 |
| <b>Figure S10.</b> <sup>13</sup> C NMR spectrum of marinoterpin B ( <b>2</b> ) (125 MHz) in CD <sub>3</sub> OD.....                          | S15 |
| <b>Figure S11.</b> <sup>1</sup> H- <sup>1</sup> H COSY NMR spectrum of marinoterpin B ( <b>2</b> ) (500 MHz) in CD <sub>3</sub> OD.....      | S16 |
| <b>Figure S12.</b> HMQC NMR spectrum of marinoterpin B ( <b>2</b> ) (500 MHz) in CD <sub>3</sub> OD.....                                     | S17 |
| <b>Figure S13.</b> HMBC NMR Spectrum of marinoterpin B ( <b>2</b> ) (500 MHz) in CD <sub>3</sub> OD.....                                     | S18 |
| <b>Figure S14.</b> Mass spectrum of marinoterpin B ( <b>2</b> ).....                                                                         | S19 |
| <b>Figure S15.</b> <sup>1</sup> H NMR Spectrum of marinoterpin C ( <b>3</b> ) (500 MHz) in CD <sub>3</sub> OD.....                           | S20 |
| <b>Figure S16.</b> <sup>13</sup> C NMR spectrum of marinoterpin C ( <b>3</b> ) (125 MHz) in CD <sub>3</sub> OD.....                          | S21 |
| <b>Figure S17.</b> <sup>1</sup> H- <sup>1</sup> H COSY NMR spectrum of marinoterpin C ( <b>3</b> ) (500 MHz) in CD <sub>3</sub> OD.....      | S22 |
| <b>Figure S18.</b> HMQC NMR spectrum of marinoterpin C ( <b>3</b> ) (500 MHz) in CD <sub>3</sub> OD.....                                     | S23 |
| <b>Figure S19.</b> HMBC NMR spectrum of marinoterpin C ( <b>3</b> ) (500 MHz) in CD <sub>3</sub> OD.....                                     | S24 |
| <b>Figure S20.</b> <i>mrt</i> biosynthetic cluster from <i>Streptomyces</i> . sp. AJS-327.....                                               | S25 |
| <b>Table S4.</b> Annotation of the 16 open reading frames of the <i>mrt</i> gene cluster from <i>Streptomyces</i> sp. AJS-327.....           | S25 |
| <b>Figure S21.</b> Phylogenetic analysis of aryl-CoA ligases.....                                                                            | S26 |
| <b>Figure S22.</b> Phylogenetic analysis of polyprenyl synthases.....                                                                        | S27 |
| <b>Figure S23.</b> Phylogenetic analysis of prenyltransferases.....                                                                          | S28 |
| <b>Figure S24.</b> Phylogenetic analysis of flavin monooxygenases.....                                                                       | S29 |
| <b>References</b> .....                                                                                                                      | S29 |

**Table S1.** 2D COSY, HMBC, and ROESY NMR data for marinoterpin A (**1**) (CD<sub>3</sub>OD, 500 MHz).

| Marinoterpin A ( <b>1</b> ) |                     |              |                               |                   |
|-----------------------------|---------------------|--------------|-------------------------------|-------------------|
| No.                         | $\delta_H/\delta_C$ | COSY         | HMBC                          | ROESY             |
| 1 -N-O                      |                     |              |                               |                   |
| 2                           | -/147.6             |              |                               |                   |
| 3                           | -/135.5             |              |                               |                   |
| 4                           | 8.48/129.5          |              | C-1', C-2, C-5, C-8a          | H-5, H-2a', H-2b' |
| 4a                          | -/128.9             |              |                               |                   |
| 5                           | 8.16/130.8          | H-6          | C-4, C-7, C-8a                | H-4               |
| 6                           | 7.79/130.2          | H-5, H-7     | C-4a, C-7, C-8                |                   |
| 7                           | 7.97/134.2          | H-6, H-8     | C-5, C-8a                     |                   |
| 8                           | 8.66/120.0          | H-7          | C-4a, C-6, C-7, C-8a          |                   |
| 8a                          | -/142.4             |              |                               |                   |
| 9                           | 2.78/16.1           |              | C-2, C-3, C-8, C-8a           |                   |
| 1'                          | -/202.9             |              |                               |                   |
| 2'                          | 3.12/49.8           |              | C-1', C-3', C-4', C-21'       | H-4, H-3'         |
|                             | 2.97                |              | C-1', C-3', C-4', C-21'       |                   |
| 3'                          | 2.17/30.3           |              | C-1', C-2', C-4', C-5', C-21' | H-21'             |
| 4'                          | 1.51/ 37.4          |              | C-3', C-5', C-6', C-21'       |                   |
|                             | 1.37                |              |                               |                   |
| 5'                          | 1.99/27.8           |              | C-4', C-6', C-7'              |                   |
| 6'                          | 5.33/121.3          |              | C-8', C-22'                   | H-8a'             |
| 7'                          | -/140.1             |              |                               |                   |
| 8'                          | 2.59/40.3           | H-9'         | C-6', C-7', C-22'             |                   |
|                             | 2.18                | H-9'         | C-7', C-9'                    |                   |
| 9'                          | 4.57/77.5           | H-8', H-10'  | C-7', C-11', C-22'            |                   |
| 10'                         | 5.19/126.2          | H-9', H-23'  | C-8', C-9', C-23'             |                   |
| 11'                         | -/140.7             |              |                               |                   |
| 12'                         | 2.04/40.0           |              | C-10', C-13', C-14', C-23'    |                   |
| 13'                         | 2.02/28.6           |              | C-11', C-12', C-14'           |                   |
| 14'                         | 5.31/120.8          |              | C-16', C-24'                  | H-16a'            |
| 15'                         | -/140.2             |              |                               |                   |
| 16'                         | 2.59/40.2           | H-17'        | C-14', C-15'                  |                   |
|                             | 2.18                | H-17'        | C-15', C-17'                  |                   |
| 17'                         | 4.57/77.4           | H-16', H-18' | C-15', C-19', C-24'           |                   |
| 18'                         | 5.19/125.9          | H-17', H-25' | C-16', C-17', C-20', C-25'    |                   |
| 19'                         | -/138.0             |              |                               |                   |
| 20'                         | 1.73/25.9           |              | C-18', C-19', C-25'           |                   |
| 21'                         | 1.03/20.1           |              | C-2', C-3', C-4'              | H-3'              |
| 22'                         | 4.39/69.0           |              | C-6', C-7', C-8', C-9'        |                   |
|                             | 4.23                |              |                               |                   |
| 23'                         | 1.70/16.7           |              | C-9', C-10', C-11', C-12'     |                   |
| 24'                         | 4.39/69.0           |              | C-14', C-15', C-16', C-17'    |                   |
|                             | 4.23                |              |                               |                   |
| 25'                         | 1.70/18.3           |              | C-17', C-18', C-19', C-20'    |                   |

**Table S2.** 2D COSY, HMBC, and NOESY NMR data for marinoterpin B (**2**) (CD<sub>3</sub>OD, 500 MHz).

| Marinoterpin B ( <b>2</b> ) |                     |              |                            |                |
|-----------------------------|---------------------|--------------|----------------------------|----------------|
| No.                         | $\delta_H/\delta_C$ | COSY         | HMBC                       | NOESY          |
| 1 -N-O                      |                     |              |                            |                |
| 2                           | -/149.6             |              |                            |                |
| 3                           | -/134.4             |              |                            |                |
| 4                           | 7.89/129.2          |              | C-2, C-3, C-8a, C-1'       | H-5            |
| 4a                          | -/129.8             |              |                            |                |
| 5                           | 7.97/129.3          | H-6          | C-4, C-7, C-8a             | H-4, H-6       |
| 6                           | 7.69/129.5          | H-5, H-7     | C-4a, C-8                  |                |
| 7                           | 7.82/131.7          | H-6, H-8     | C-5, C-8a                  | H-6, H-8       |
| 8                           | 8.60/119.7          | H-7          | C-4a, C-6                  | H-7            |
| 8a                          | -/138.5             |              |                            |                |
| 9                           | 2.73/15.0           |              | C-2, C-3                   | H-1'           |
| 1'                          | 3.61/33.1           | H-2'         | C-2, C-3, C-4, C-2', C-3'  | H-9, H-21'     |
| 2'                          | 5.33/122.1          | H-1'         | C-1', C-4', C-21'          | H-4'           |
| 3'                          | -/139.4             |              |                            |                |
| 4'                          | 2.18/40.2           | H-5'         | C-5'                       | H-2'           |
| 5'                          | 2.11/28.7           | H-4', H-6'   | C-6', C-7'                 | H-22a', H-22b' |
| 6'                          | 5.32/121.0          | H-5'         | C-22'                      | H-8a', H-8b'   |
| 7'                          | -/140.2             |              |                            |                |
| 8'                          | 2.18/40.3           | H-9'         | C-7'                       | H-6'           |
|                             | 2.58                | H-9'         | C-7', C-22'                | H-6', H-9'     |
| 9'                          | 4.55/77.5           | H-8', H-10'  | C-22'                      | H-8b', H-23'   |
| 10'                         | 5.18/126.3          | H-9'         | C-8', C-23'                | H-12'          |
| 11'                         | -/140.7             |              |                            |                |
| 12'                         | 2.06/40.0           | H-13'        | C-10', C-11', C-13', C-23' | H-10'          |
| 13'                         | 2.05/28.6           | H-12', H-14' | C-14', C-15'               | H-24a', H-24b' |
| 14'                         | 5.29/120.8          | H-13'        |                            | H-16a', H-16b' |
| 15'                         | -/140.2             |              |                            |                |
| 16'                         | 2.18/40.3           | H-17'        | C-15'                      | H-14'          |
|                             | 2.58                | H-17'        | C-15', C-24'               | H-17'          |
| 17'                         | 4.55/77.4           | H-16', H-18' | C-24'                      | H-16b', H-25'  |
| 18'                         | 5.18/125.9          | H-17'        | C-16', C-20', C-25'        | H-20'          |
| 19'                         | -/138.0             |              |                            |                |
| 20'                         | 1.72/25.9           |              | C-18', C-19', C-25'        | H-18'          |
| 21'                         | 1.79/16.4           |              | C-2', C-3', C-4'           | H-1'           |
| 22'                         | 4.21 d (13)/69.0    | H-6'         | C-6', C-7'                 | H-5'           |
|                             | 4.38 t (12.5)       | H-6'         | C-6', C-7', C-9'           | H-5'           |
| 23'                         | 1.67/16.7           |              | C-10', C-11', C-12'        | H-9'           |
| 24'                         | 4.21/ 69.0          | H-14'        | C-14', C-15'               | H-13'          |
|                             | 4.38                | H-14'        | C-14', C-15', C-17'        | H-13'          |
| 25'                         | 1.69/18.3           |              | C-18', C-19', C-20'        | H-17'          |

**Table S3.** 2D COSY and HMBC NMR data for marinoterpin C (**3**) (CD<sub>3</sub>OD, 500 MHz).

| Marinoterpin C ( <b>3</b> ) |                     |              |                            |
|-----------------------------|---------------------|--------------|----------------------------|
| Position                    | $\delta_H/\delta_C$ | COSY         | HMBC                       |
| 1 -N                        |                     |              |                            |
| 2                           | -/163.1             |              |                            |
| 3                           | -/138.3             |              |                            |
| 4                           | 7.67/135.5          |              | C-2, C-3, C-5', C-8a, C-1' |
| 4a                          | -/121.3             |              |                            |
| 5                           | 7.64/128.2          | H-6          | C-4, C-7, C-8a             |
| 6                           | 7.29/122.6          | H-5, H-7     | C-4a, C-8                  |
| 7                           | 7.60/129.8          | H-6, H-8     | C-5, C-8a                  |
| 8                           | 7.55/114.4          | H-7          | C-4a, C-6                  |
| 8a                          | -/138.5             |              |                            |
| 9                           | 4.55/77.1           |              | C-2, C-3                   |
| 1'                          | 3.33/28.9           | H-2'         | C-2, C-3, C-4, C-2', C-3'  |
| 2'                          | 5.41/121.2          | H-1'         | C-1', C-4', C-21'          |
| 3'                          | -/138.2             |              |                            |
| 4'                          | 2.19/39.1           | H-5'         | C-5'                       |
| 5'                          | 2.13/27.7           | H-4', H-6'   | C-6', C-7'                 |
| 6'                          | 5.37/129.6          | H-5'         | C-22'                      |
| 7'                          | -/138.8             |              |                            |
| 8'                          | 2.18/39.1           | H-9'         | C-7'                       |
|                             | 2.58                | H-9'         | C-7', C-22'                |
| 9'                          | 4.55/76.3           | H-8', H-10'  | C-22'                      |
| 10'                         | 5.19/124.8          | H-9'         | C-8', C-23'                |
| 11'                         | -/139.6             |              |                            |
| 12'                         | 2.06/38.5           | H-13'        | C-10', C-11', C-23'        |
| 13'                         | 2.05/28.9           | H-12', H-14' | C-14', C-15'               |
| 14'                         | 5.30/120.1          | H-13'        |                            |
| 15'                         | -/137.1             |              |                            |
| 16'                         | 2.58/39.5           | H-17'        | C-15', C-24'               |
| 17'                         | 4.55/76.1           | H-16', H-18' | C-24'                      |
| 18'                         | 5.18/125.2          | H-17'        | C-16', C-20', C-25'        |
| 19'                         | -/139.6             |              |                            |
| 20'                         | 1.73/24.8           |              | C-18', C-19', C-25'        |
| 21'                         | 1.61/16.1           |              | C-2', C-3', C-4'           |
| 22'                         | 4.21/67.9           | H-6'         | C-6', C-7'                 |
|                             | 4.39                | H-6'         | C-6', C-7', C-9'           |
| 23'                         | 1.73/15.1           |              | C-10', C-11', C-12'        |
| 24'                         | 4.21/67.9           | H-14'        | C-14', C-15'               |
|                             | 4.39                | H-14'        | C-14', C-15', C-17'        |
| 25'                         | 1.71/15.5           |              | C-18', C-19', C-20'        |

Figure S1.  $^1\text{H}$  NMR spectrum of marinoterpin A (**1**) (500 MHz) in  $\text{CD}_3\text{OD}$ .

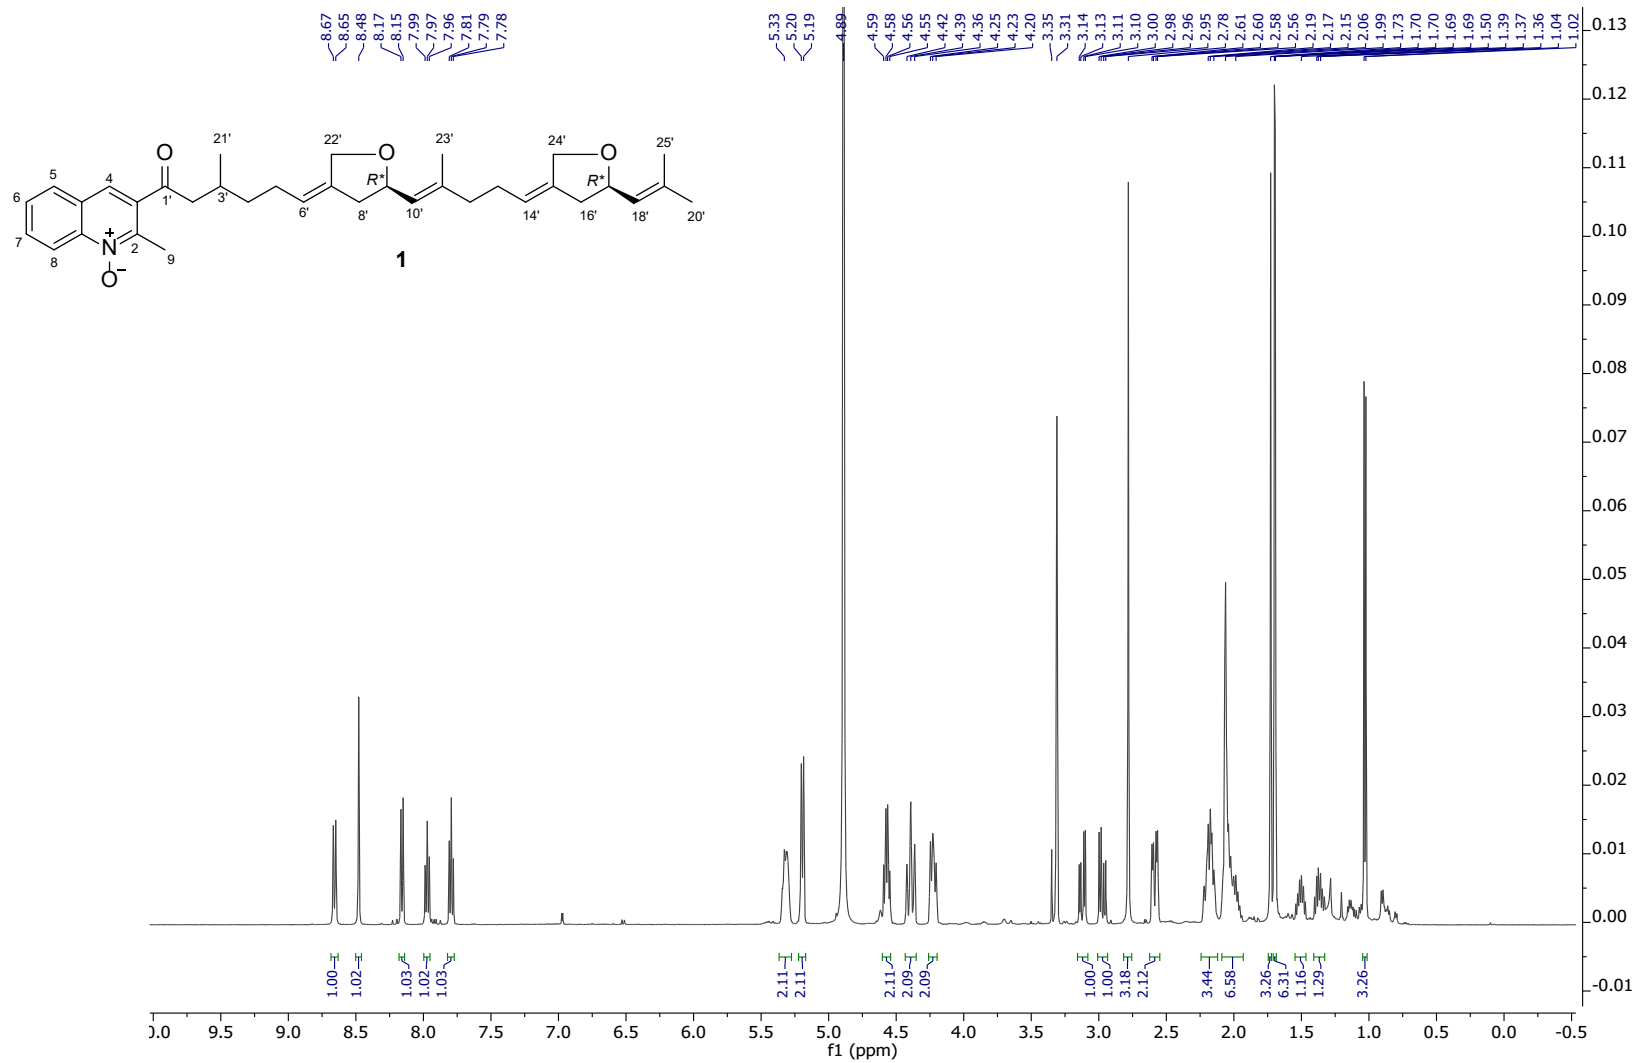

**Figure S2.**  $^{13}\text{C}$  NMR spectrum of marinoterpin A (**1**) (125 MHz) in  $\text{CD}_3\text{OD}$ .

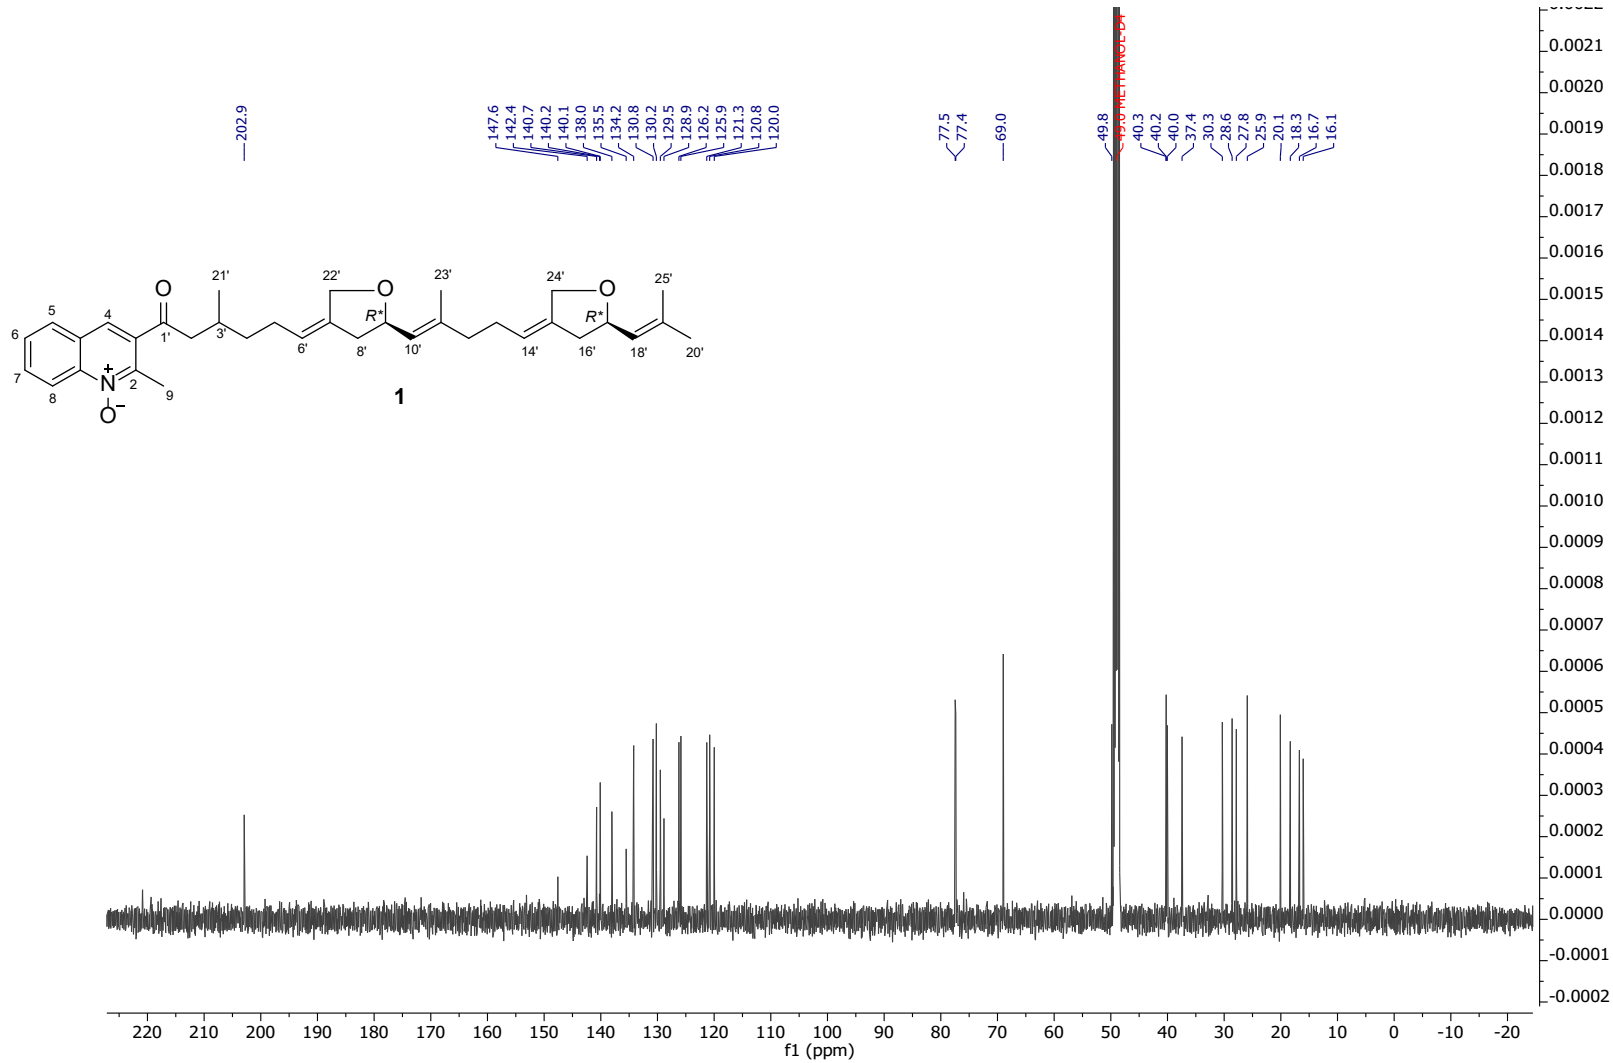

**Figure S3.**  $^1\text{H}$ - $^1\text{H}$  COSY spectrum of marinoterpin A (**1**) (500 MHz) in  $\text{CD}_3\text{OD}$ .

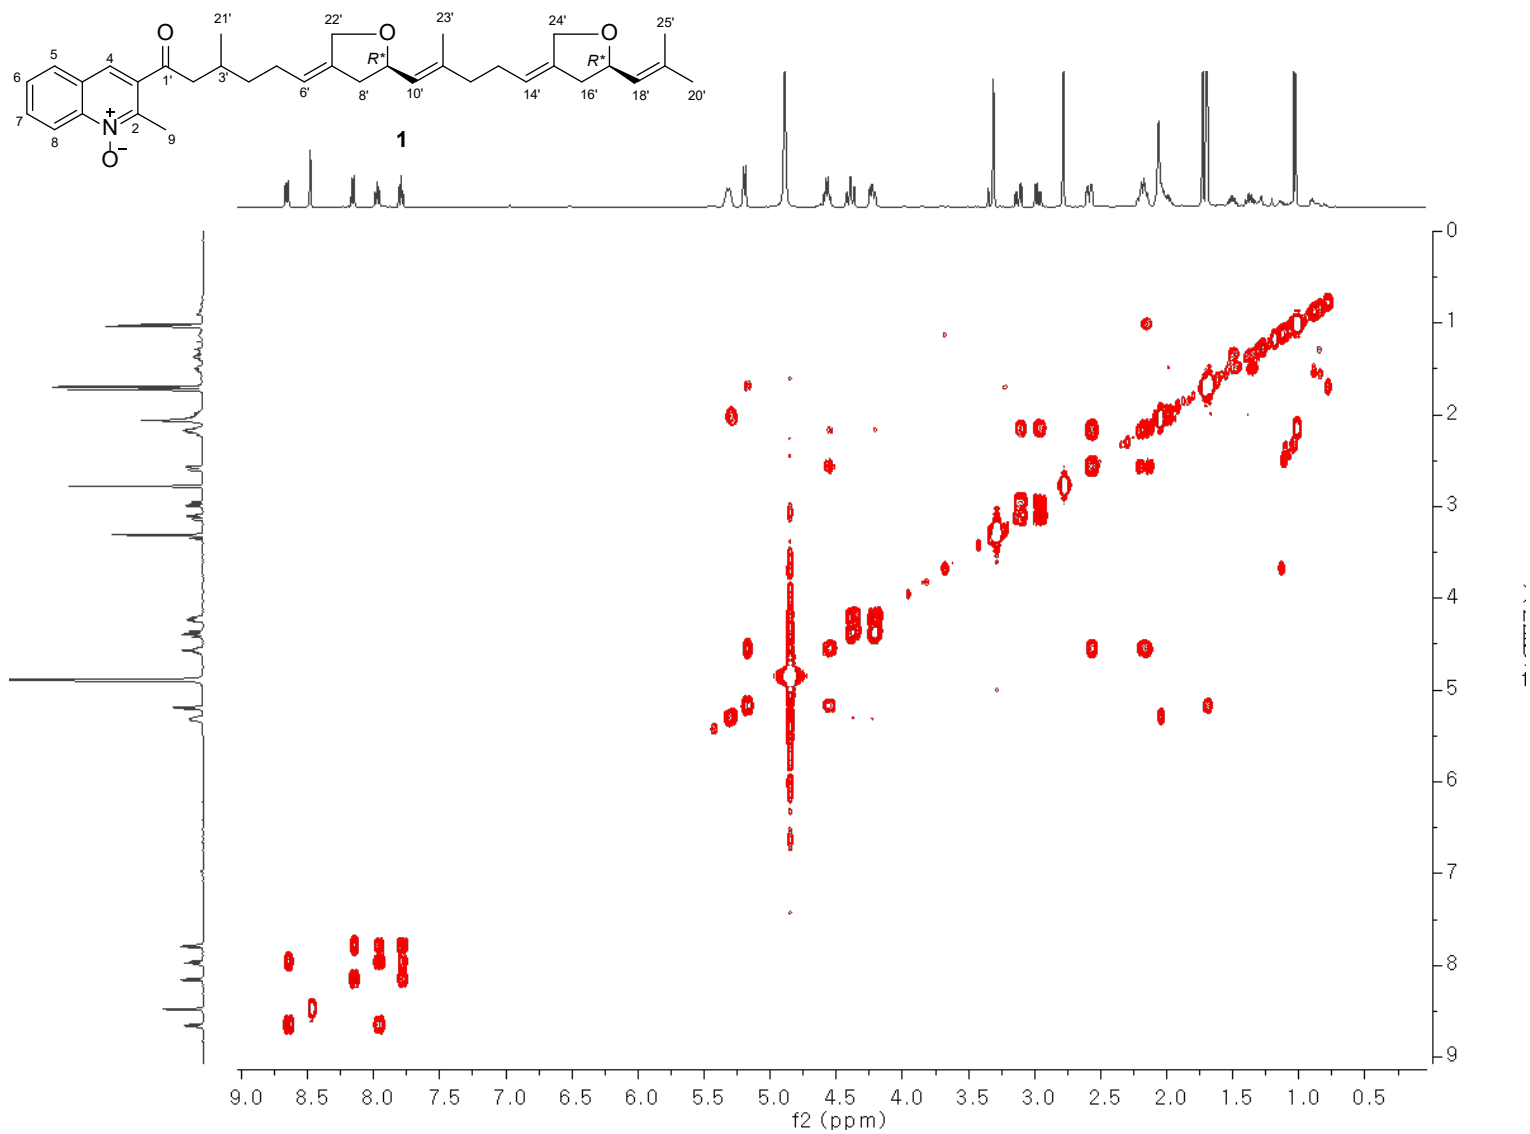



**Figure S4.** HSQC spectrum of marinoterpin A (**1**) (500 MHz) in CD<sub>3</sub>OD.

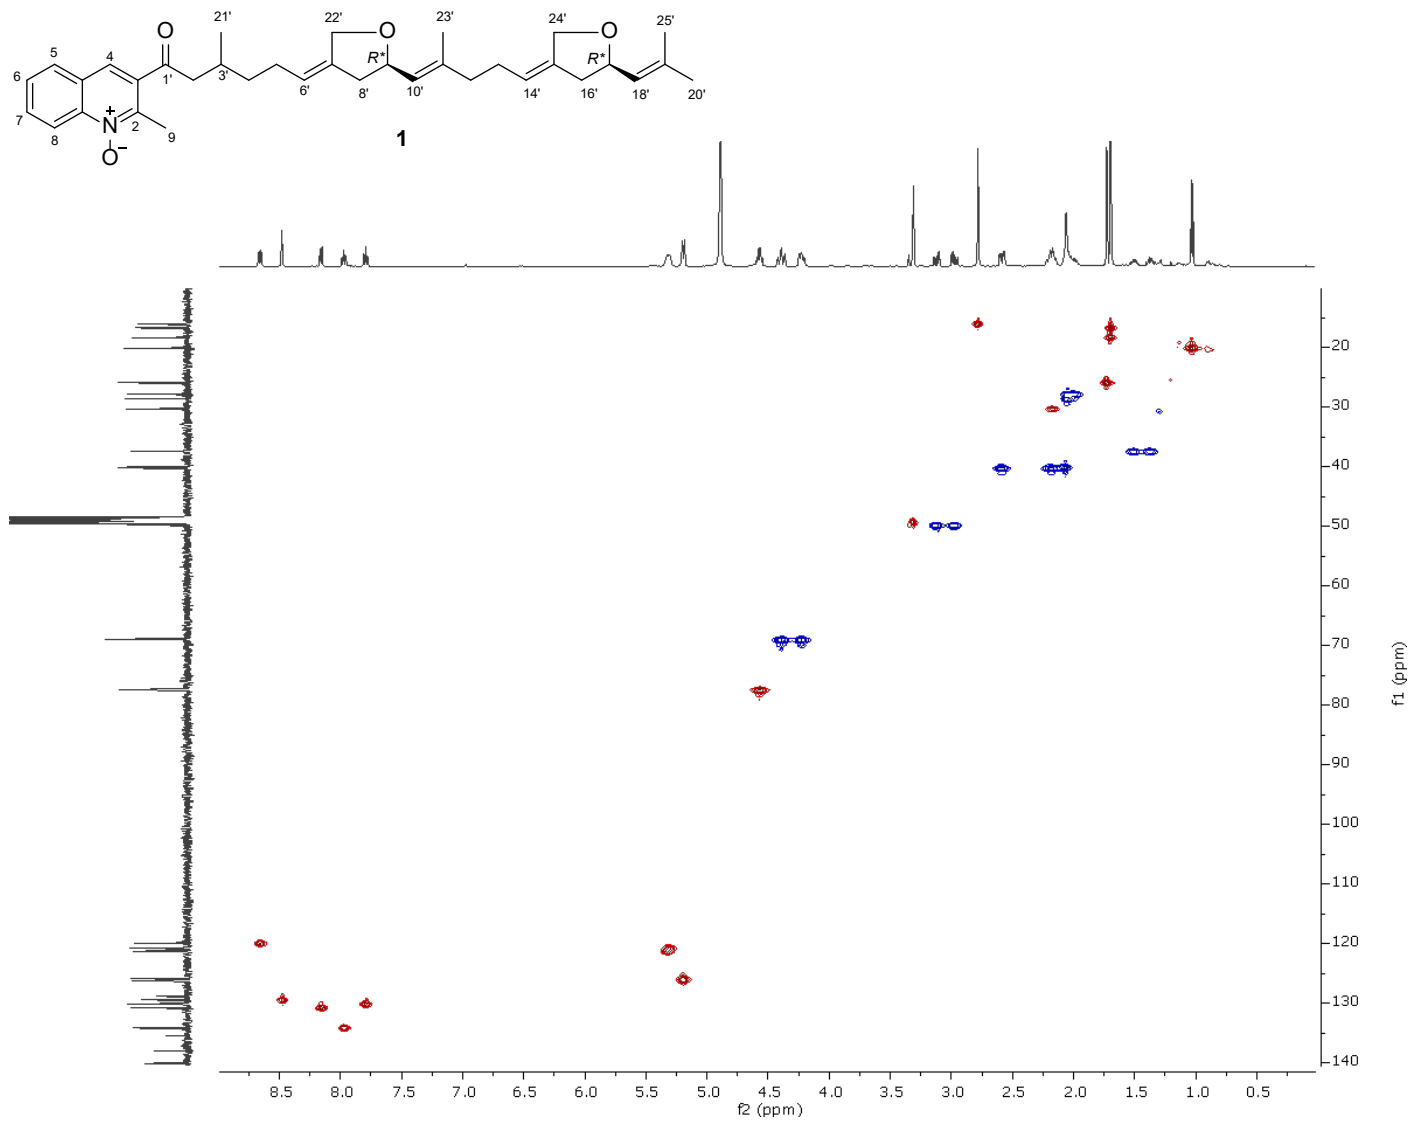

**Figure S5.** HMBC spectrum of marinoterpin A (**1**) (500 MHz) in CD<sub>3</sub>OD.

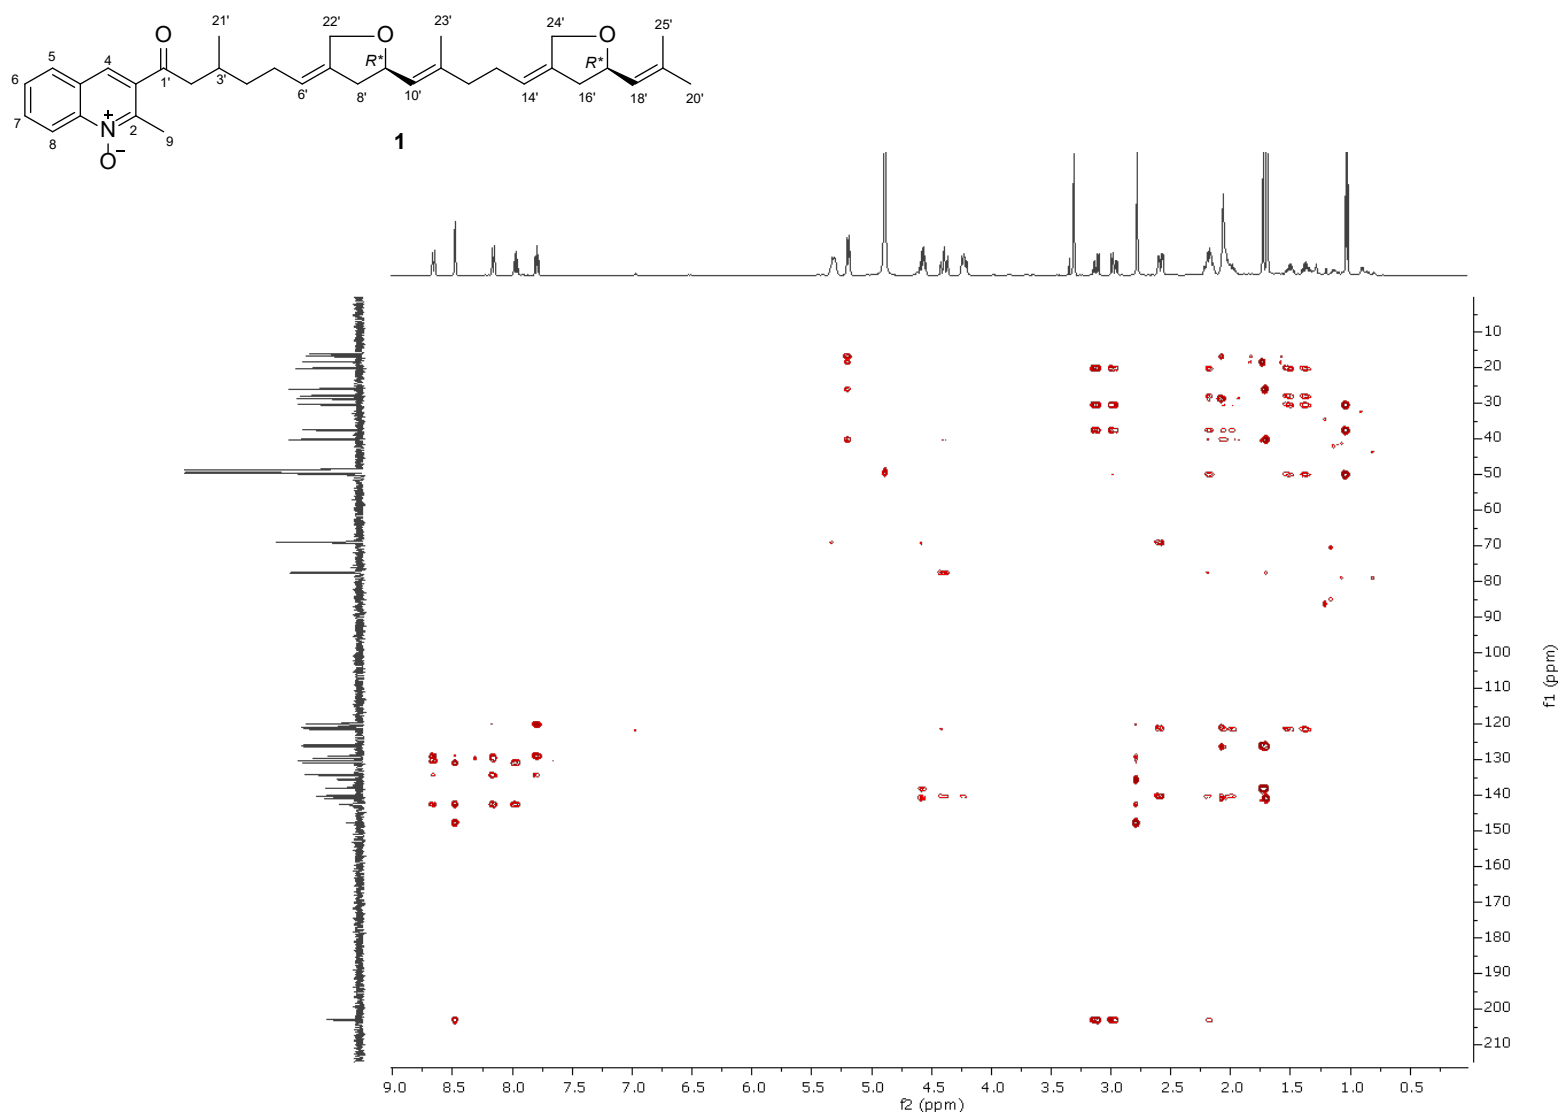

**Figure S6.** ROESY spectrum of marinoterpin A (**1**) (500 MHz) in CD<sub>3</sub>OD.

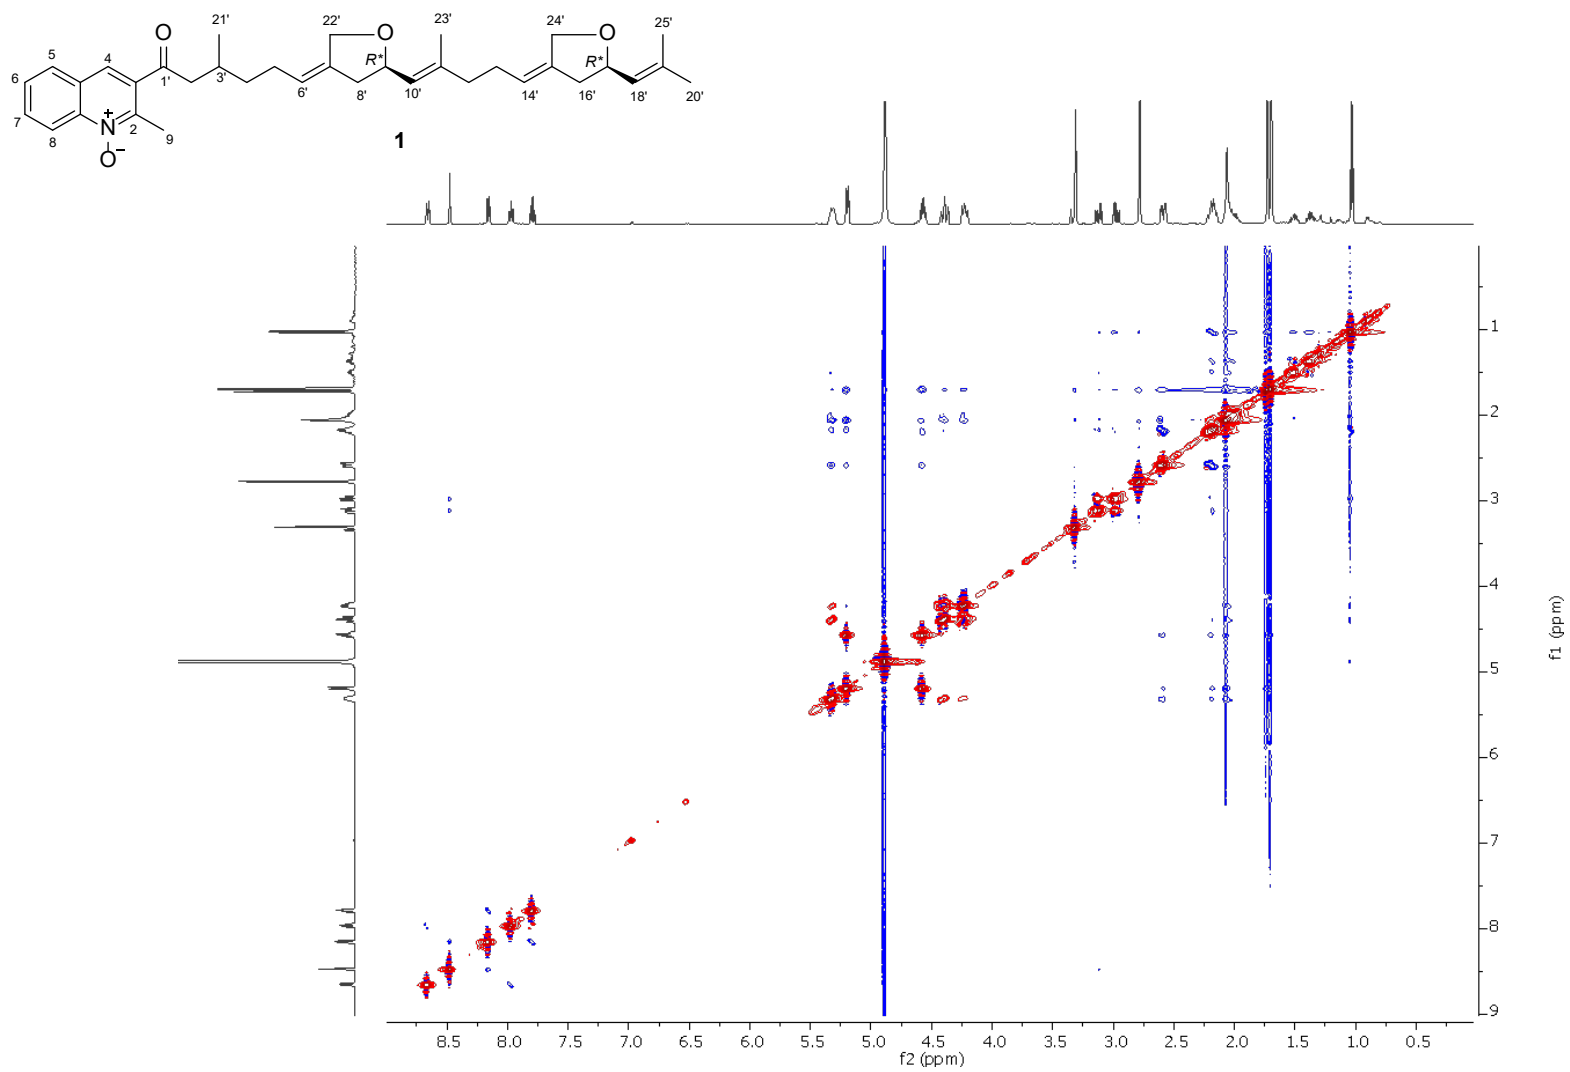

**Figure S7.** Homo 2D *J*-resolved  $^1\text{H}$  NMR spectrum of marinoterpin A (**1**) (500 MHz) in  $\text{CD}_3\text{OD}$ .

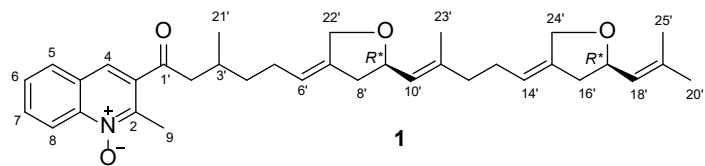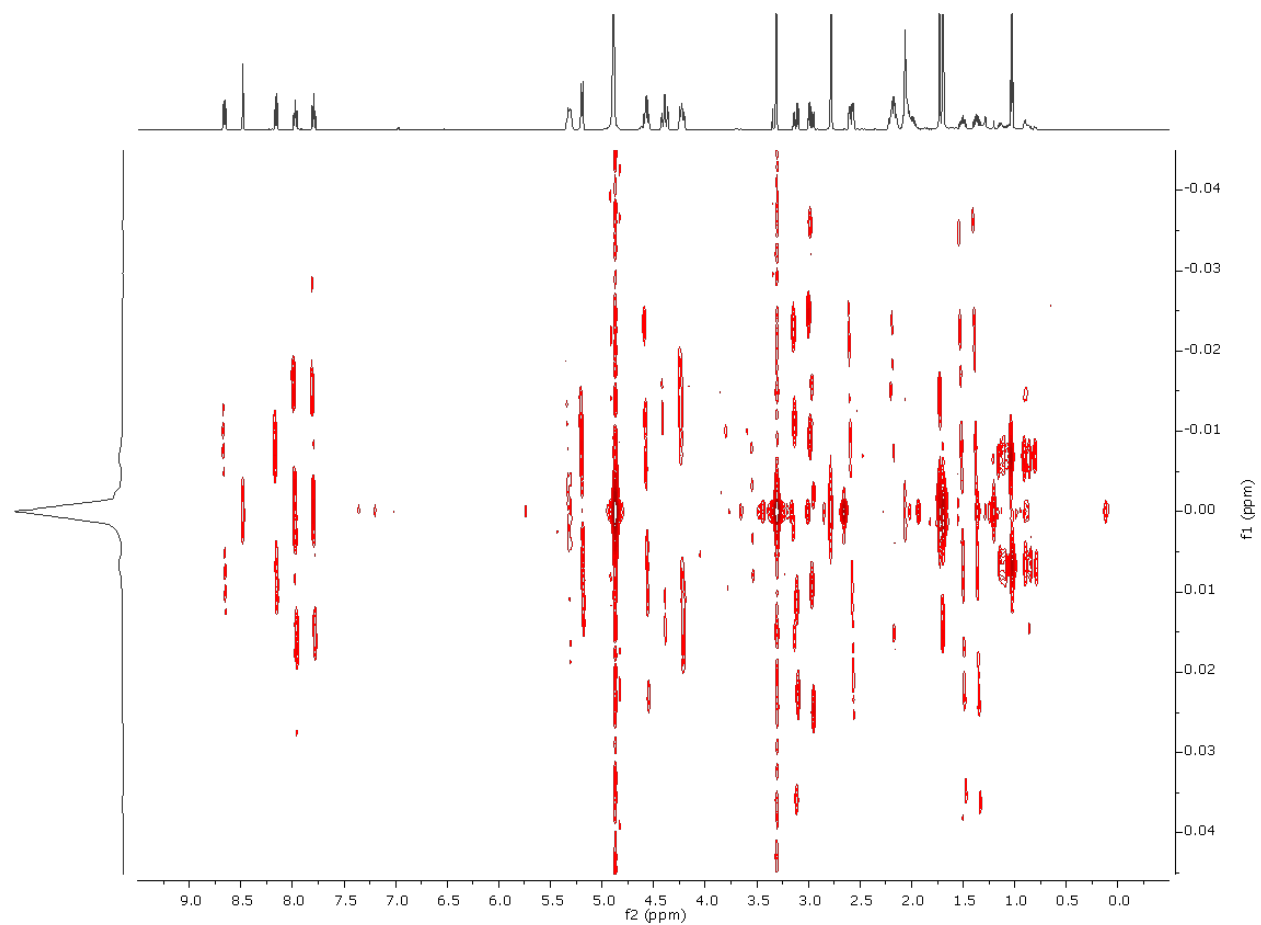

**Figure S8.** HR-ESI-TOFMS spectrum of marinoterpin A (**1**).

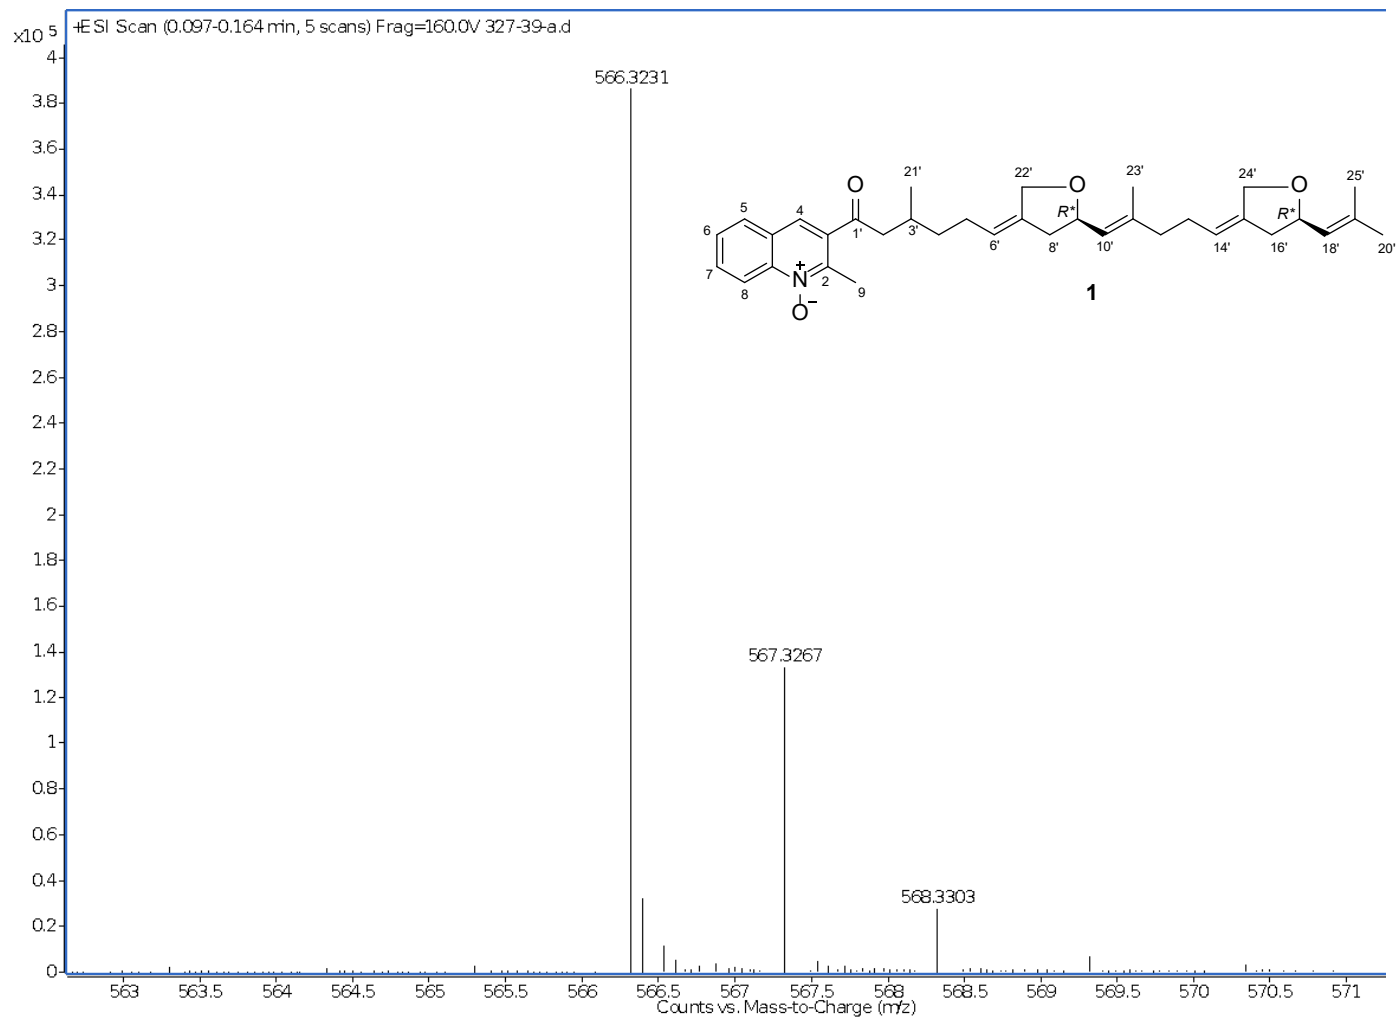

**Figure S9.**  $^1\text{H}$  NMR spectrum of marinoterpin B (**2**) at (500 MHz) in  $\text{CD}_3\text{OD}$ .

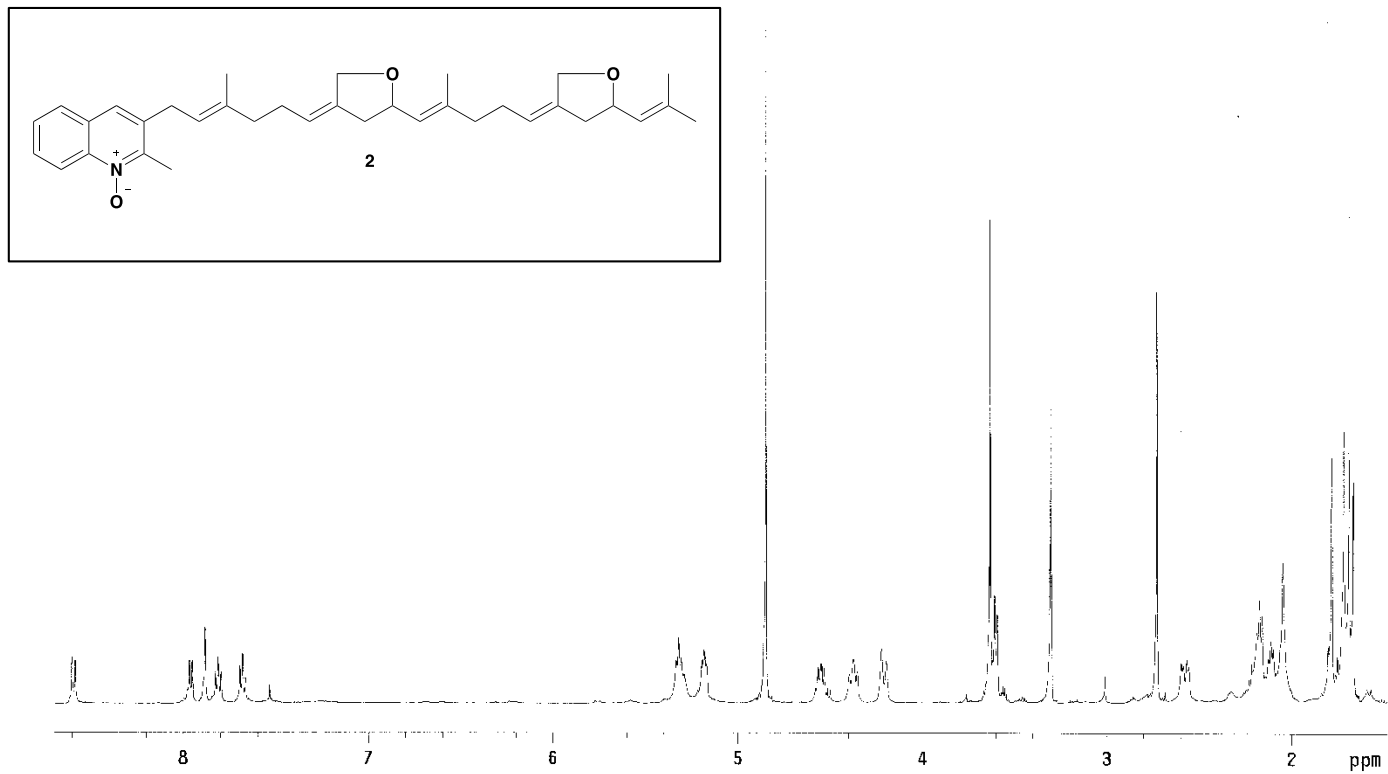

**Figure S10.**  $^{13}\text{C}$  NMR spectrum of marinoterpin B (**2**) (125 MHz) in  $\text{CD}_3\text{OD}$

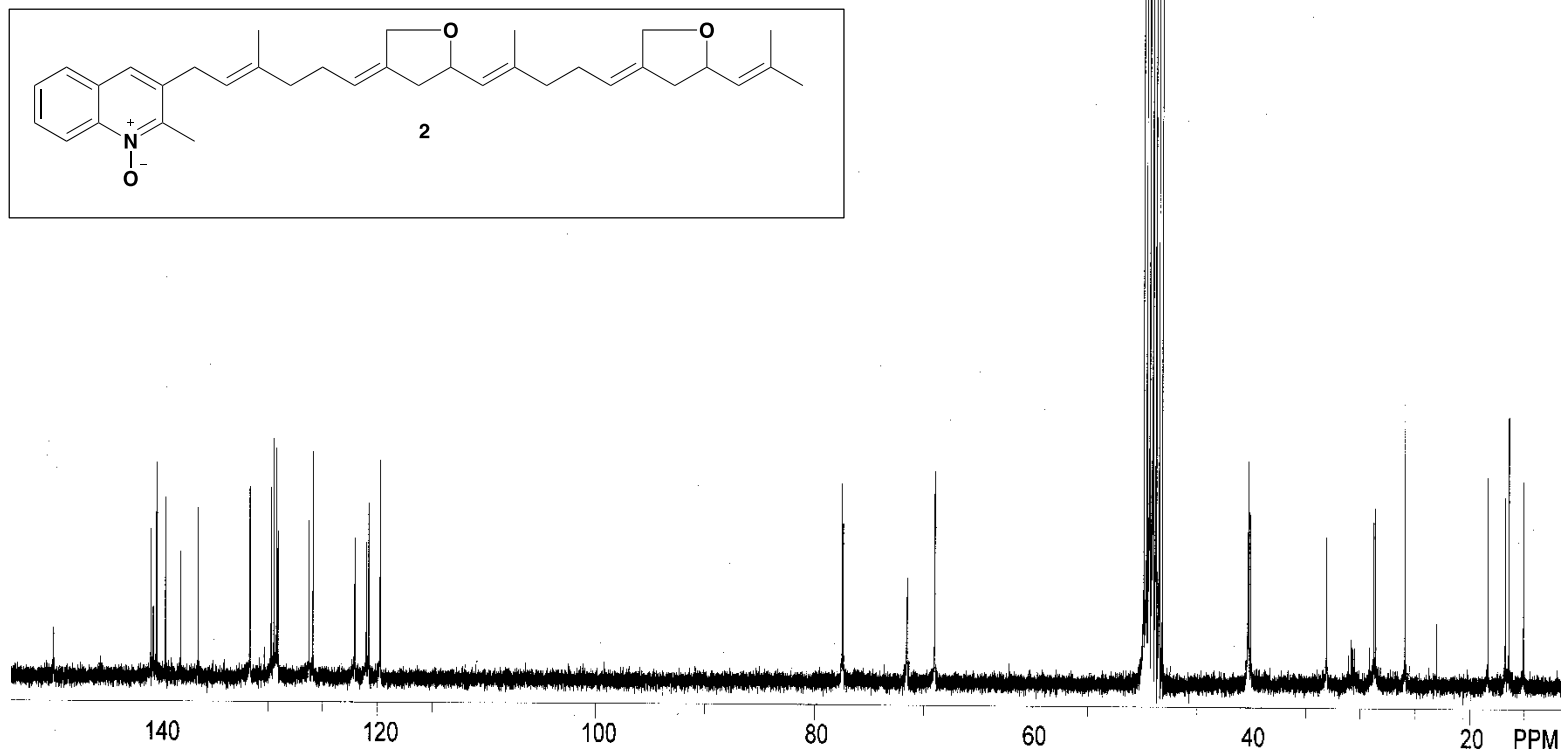





**Figure S12.** HMQC NMR spectrum of marinoterpin B (**2**) (500 MHz) in CD<sub>3</sub>OD.

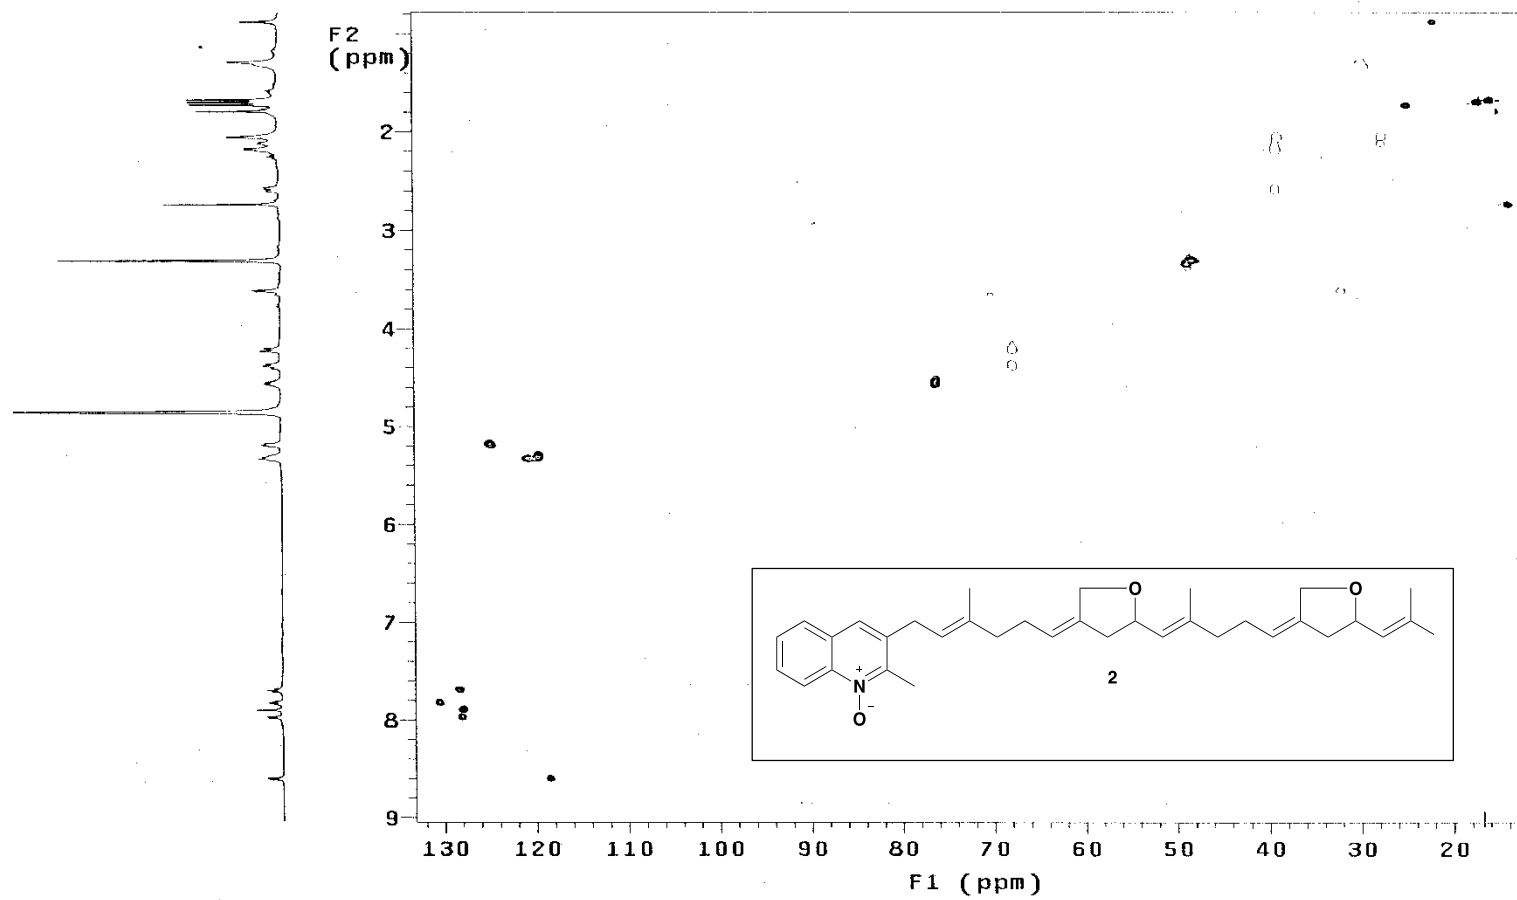

**Figure S13.** HMBC NMR spectrum of marinoterpin B (**2**) (500 MHz) in CD<sub>3</sub>OD.

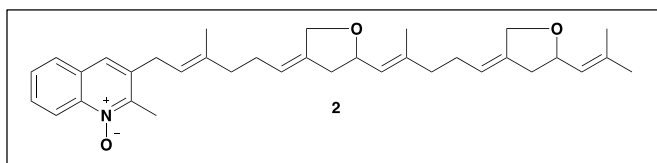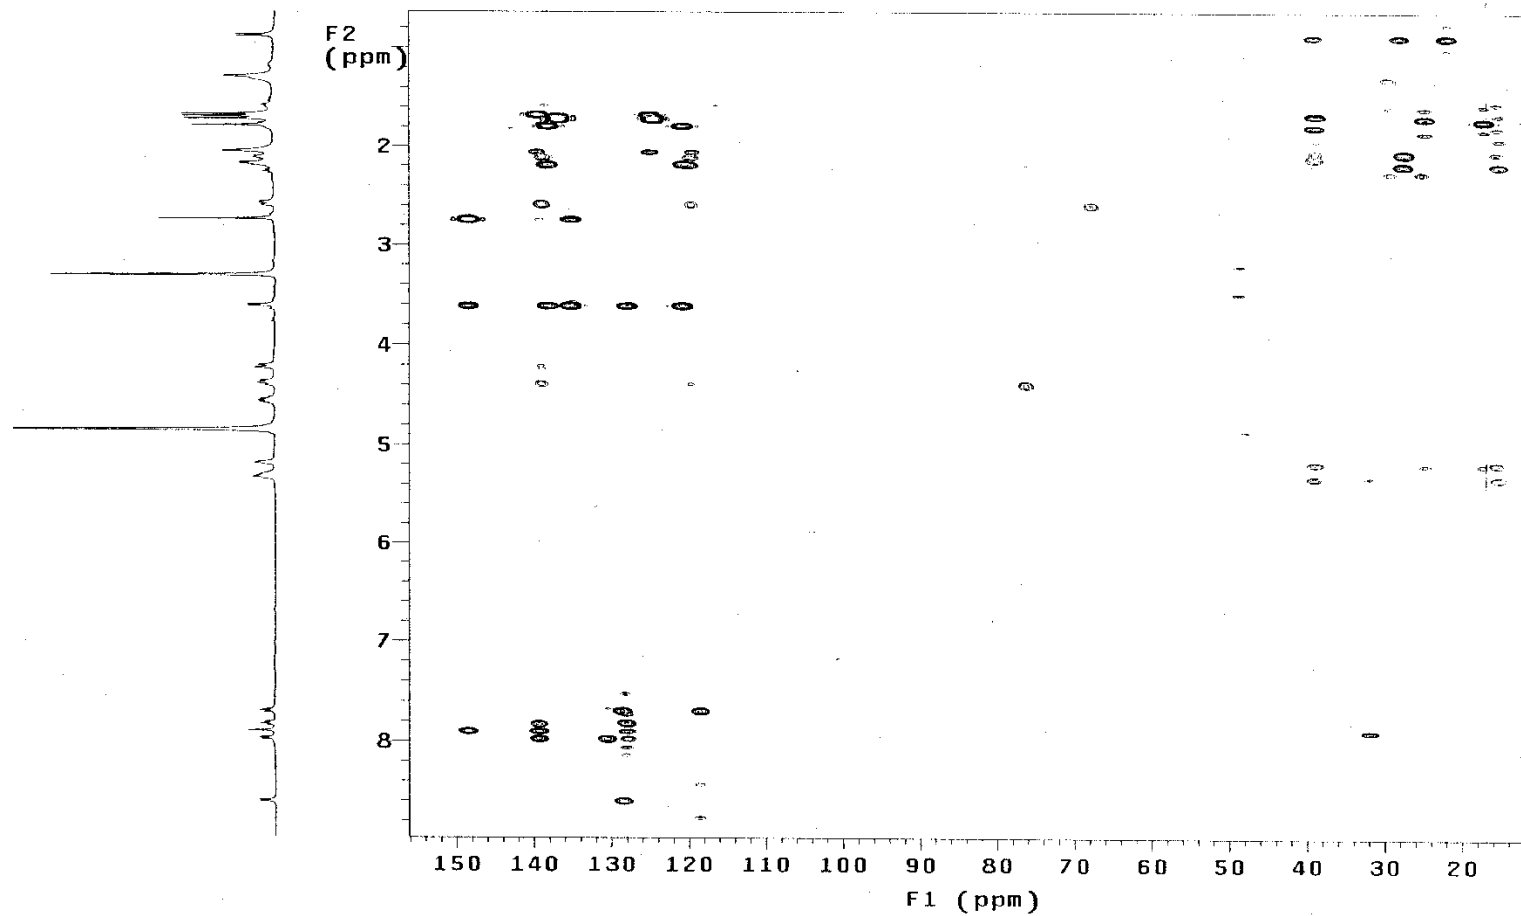

**Figure S14.** ESI mass spectrum of marinoterpin B (2).

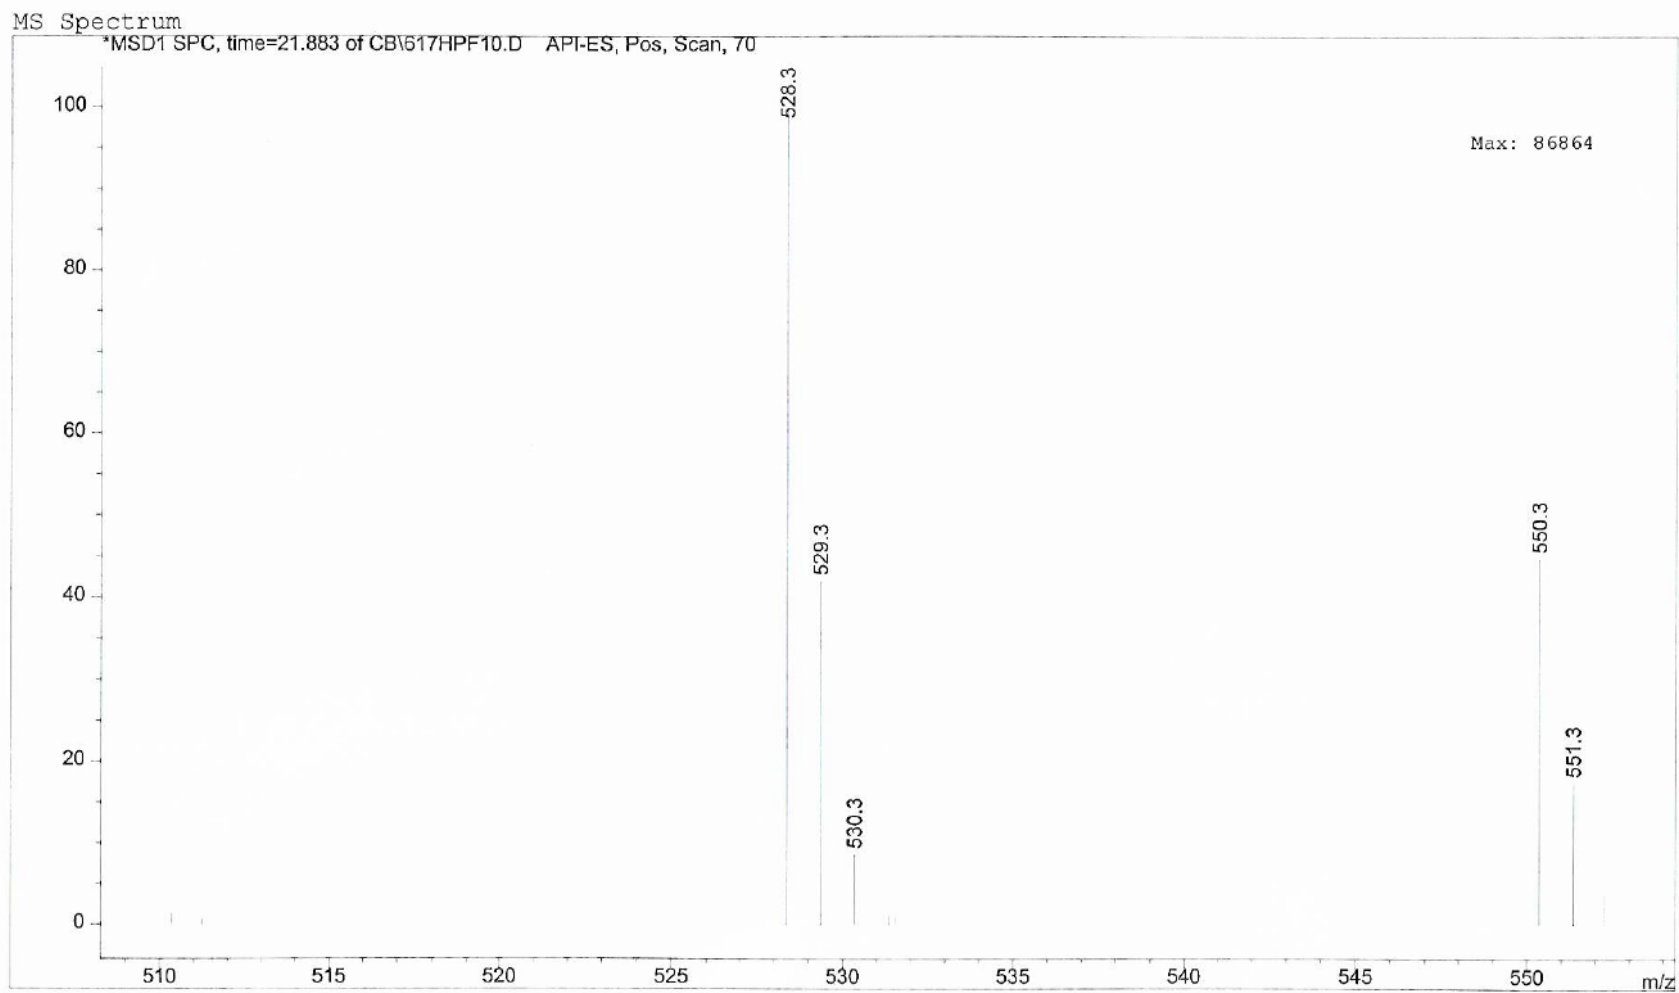

**Figure S15.**  $^1\text{H}$  NMR spectrum of marinoterpin C (**3**) (500 MHz) in  $\text{CD}_3\text{OD}$ .

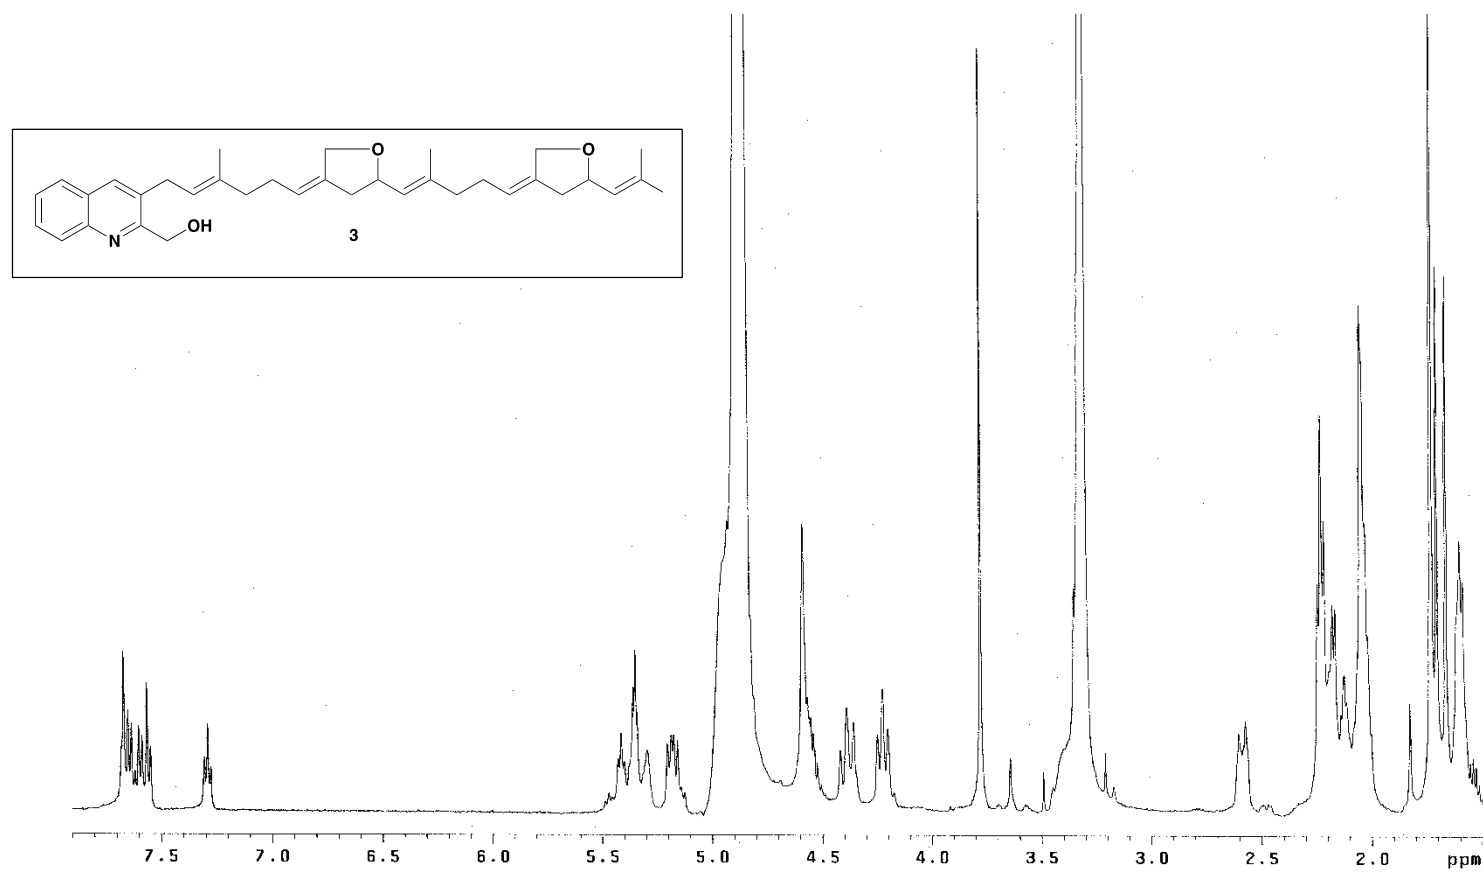

Figure S16.  $^{13}\text{C}$  NMR spectrum of marinoterpin C (**3**) (125 MHz) in  $\text{CD}_3\text{OD}$ .

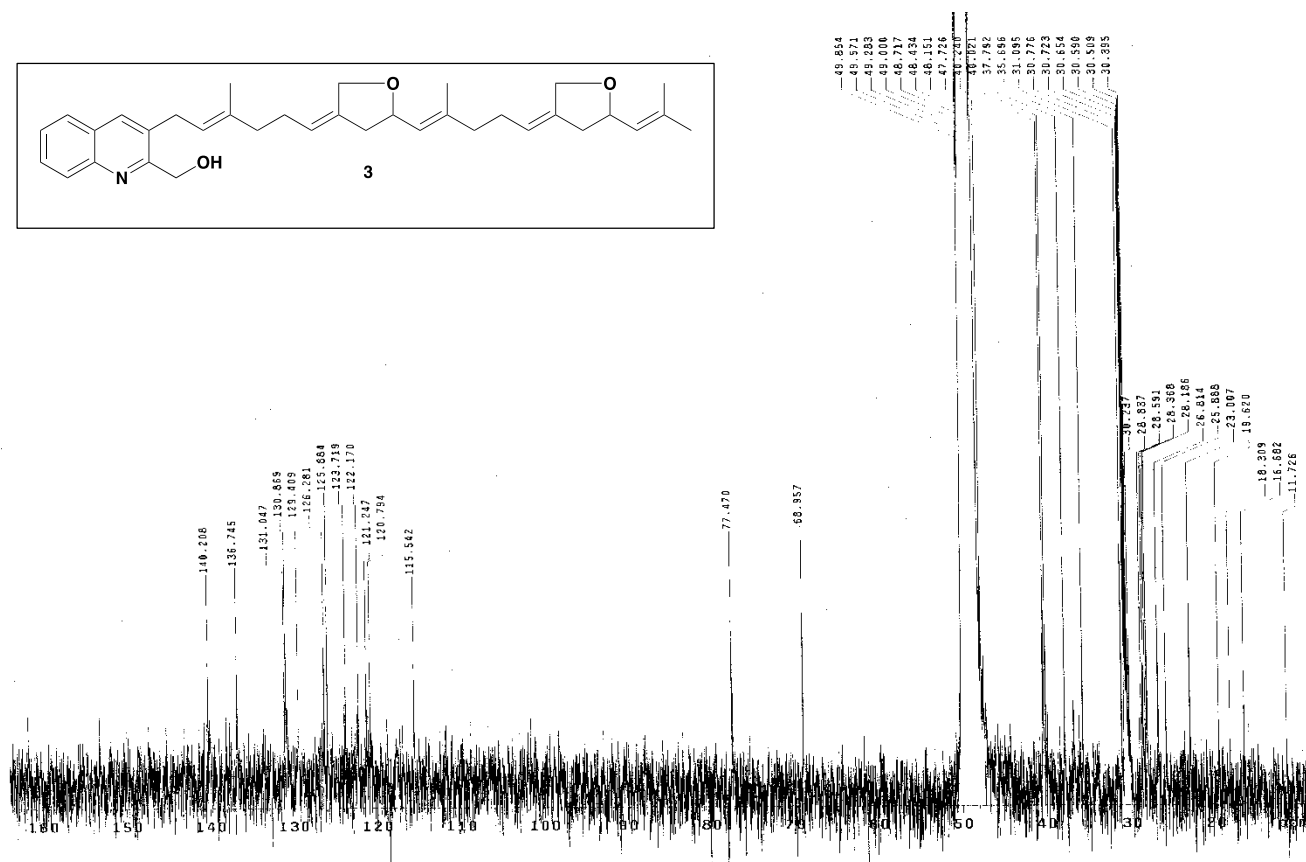

**Figure S17.**  $^1\text{H}$ - $^1\text{H}$  COSY NMR spectrum of marinoterpin C (**3**) (500 MHz) in  $\text{CD}_3\text{OD}$ .

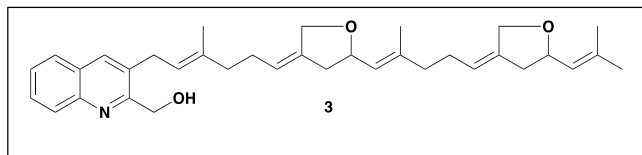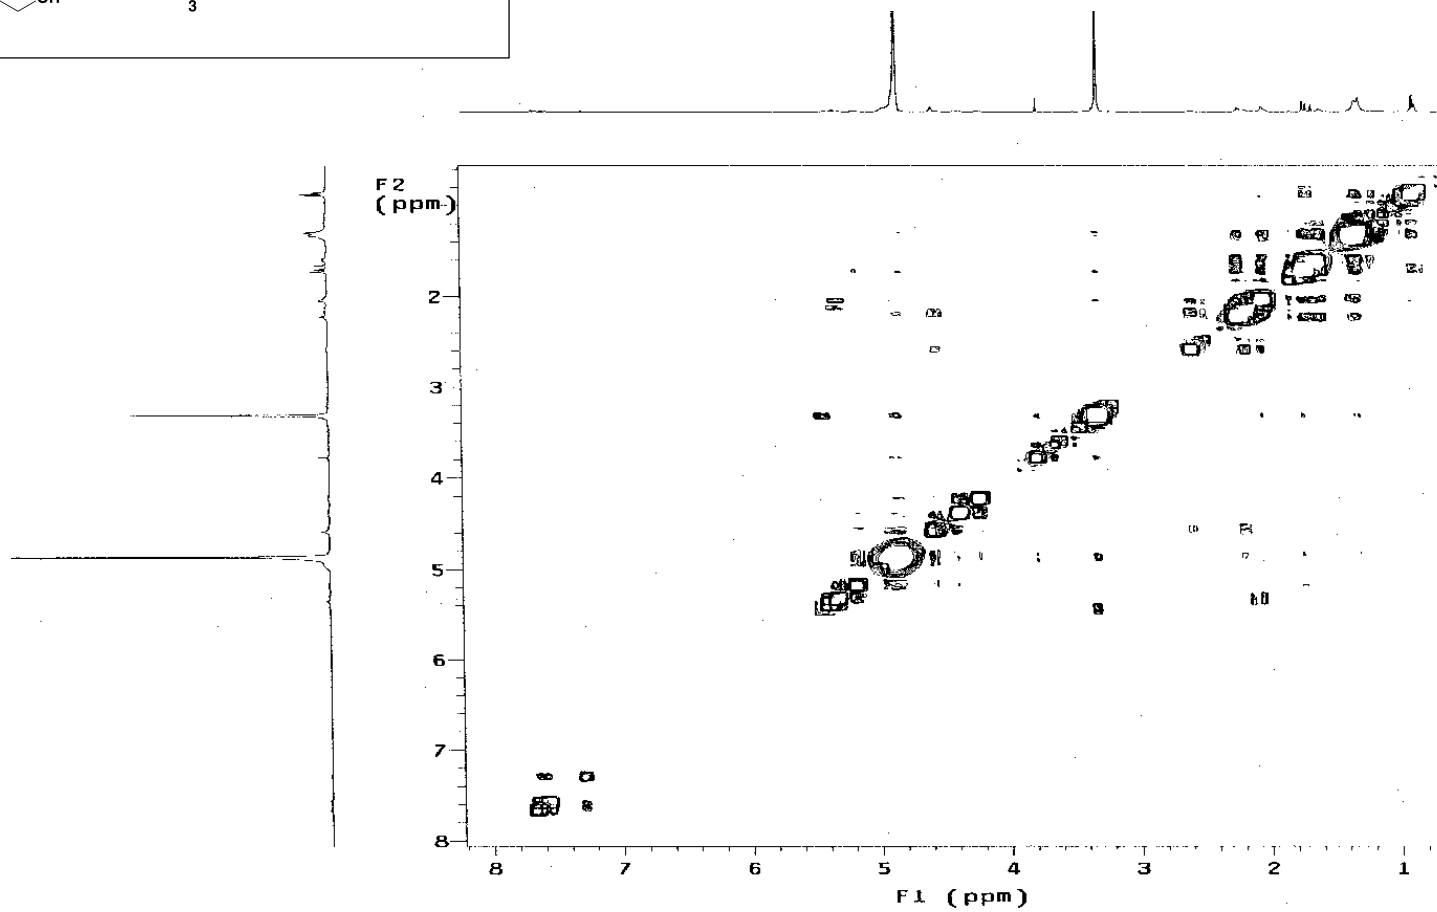

**Figure S18.** HMQC NMR spectrum of marinoterpin C (**3**) (500 MHz) in CD<sub>3</sub>OD.

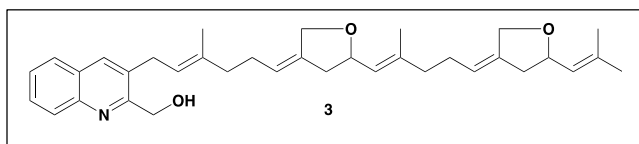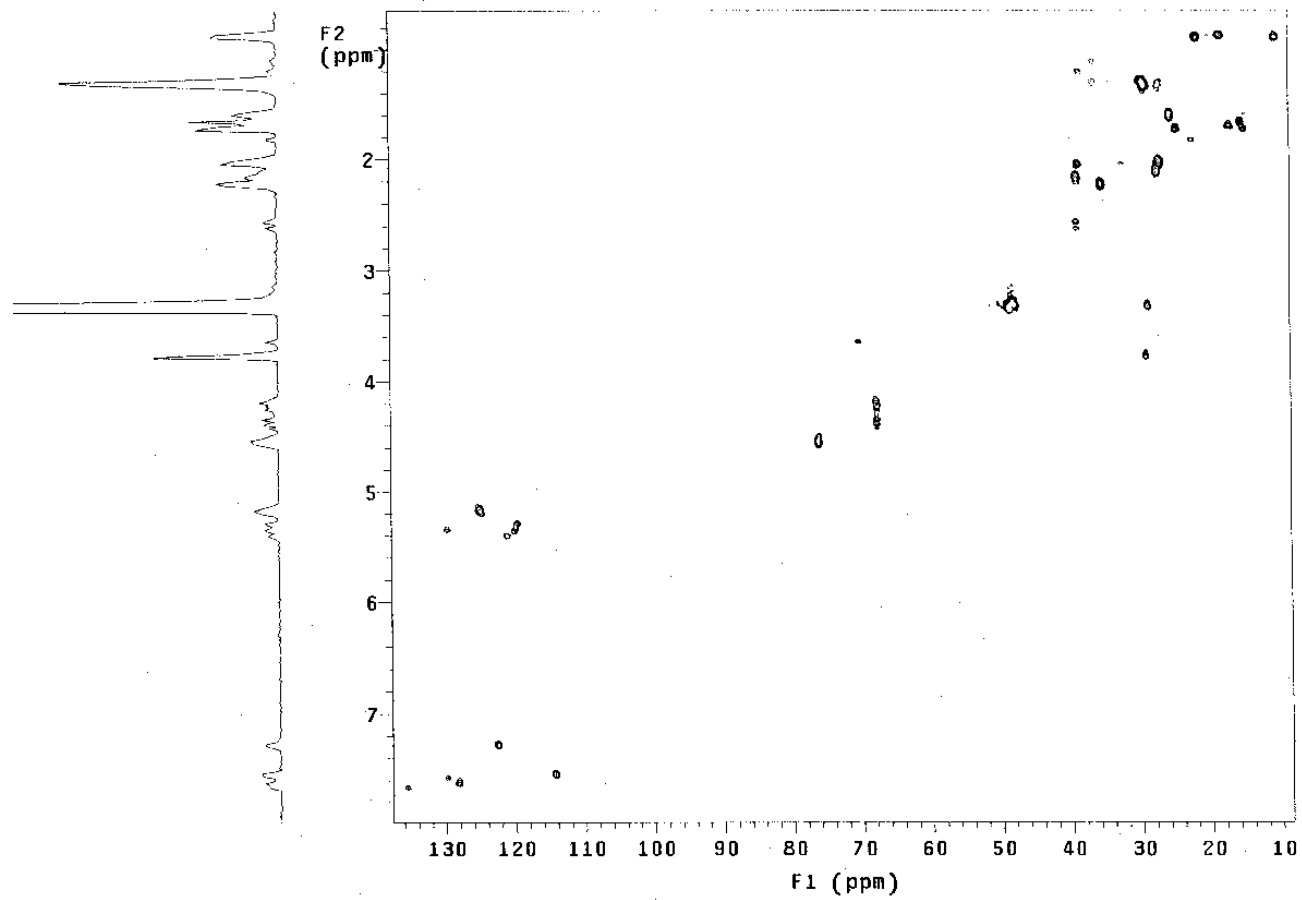

**Figure S19.** HMBC NMR spectrum of marinoterpin C (**3**) (500 MHz) in CD<sub>3</sub>OD.

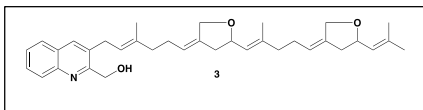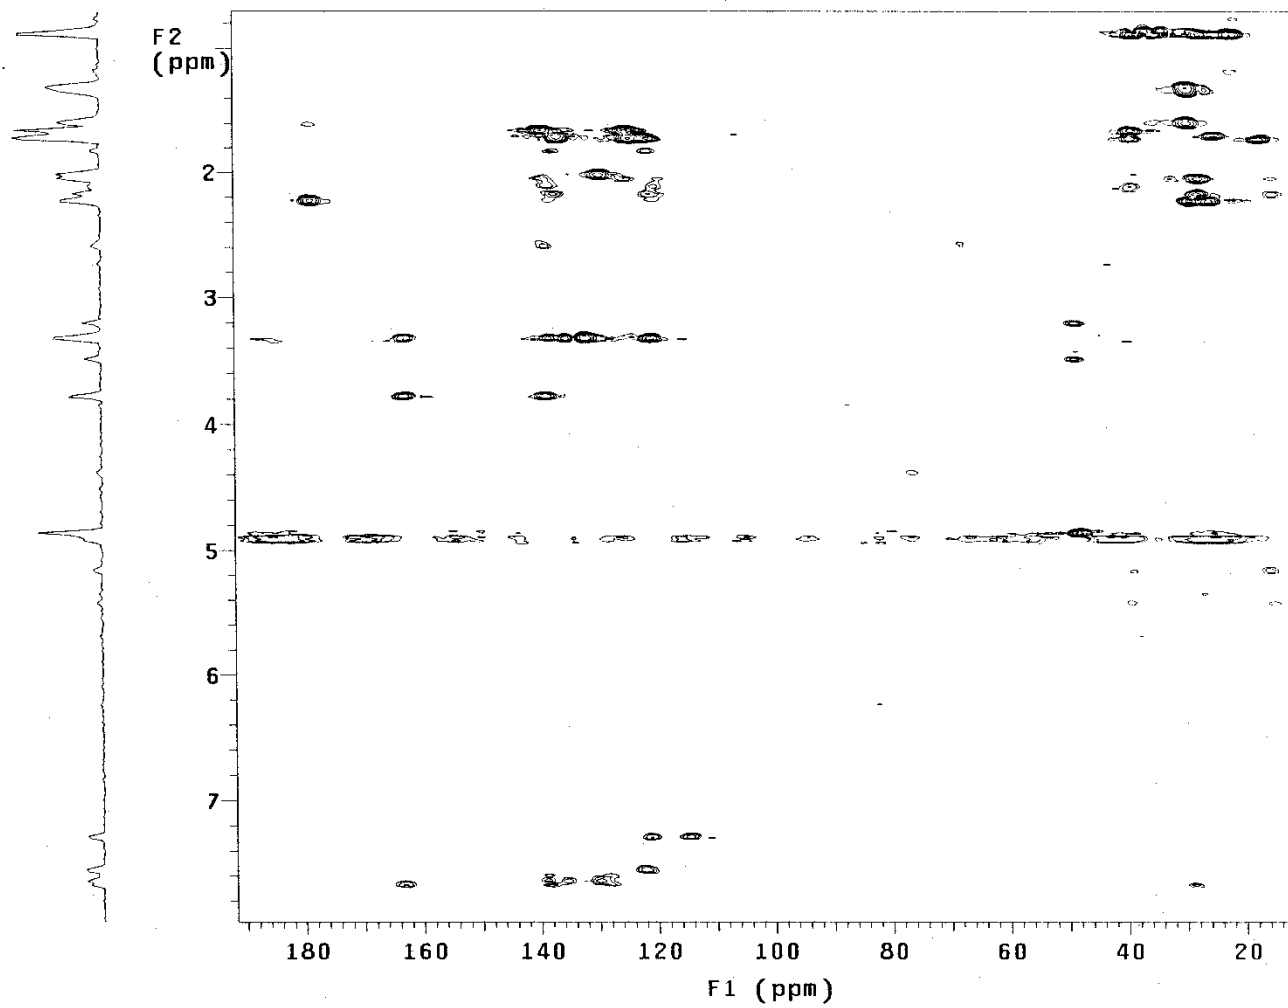



**Figure S20.** Organization of the *mrt* biosynthetic cluster in *Streptomyces* sp. AJS-327. The arrows represent open reading frames and point in the direction of transcription.

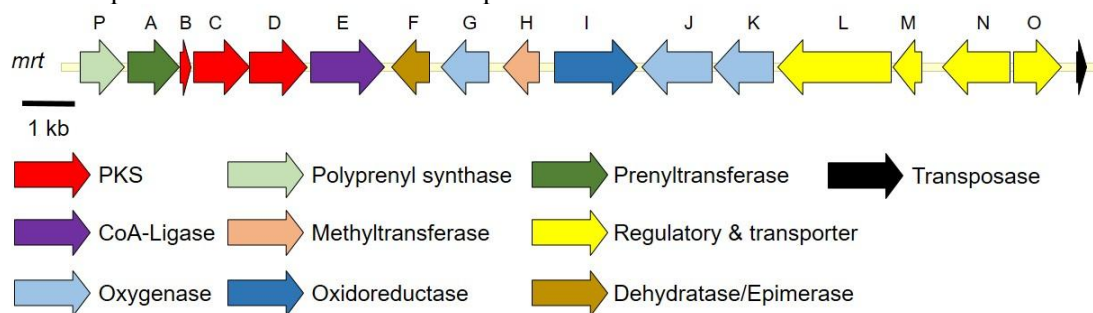

**Table S4.** Annotated functions of the open reading frames in the *mrt* biosynthetic cluster

| Gene Product | NCBI Reference Sequence | Proposed function                                            | Sequence similarity (origin)         | Similarity / identity (%) | Accession number |
|--------------|-------------------------|--------------------------------------------------------------|--------------------------------------|---------------------------|------------------|
| MrtP         | WP_180926943            | Polyprenyl synthase                                          | <i>Streptomyces</i> sp. CNZ298       | 68/78                     | MBB6534444       |
| MrtA         | WP_180926944            | UbiA family prenyltransferase                                | <i>Streptomyces</i> sp. CNZ279       | 72/79                     | WP_099885763     |
| MrtB         | WP_180926945            | Acyl carrier protein                                         | Unclassified <i>Streptomyces</i> sp. | 71/86                     | WP_099885764     |
| MrtC         | WP_180926946            | Beta-ketoacyl-[acyl-carrier-protein] synthase family protein | Unclassified <i>Streptomyces</i> sp. | 67/74                     | WP_099885765     |
| MrtD         | WP_180926947            | Beta-ketoacyl-CLF synthase II                                | <i>Streptomyces vitaminophilus</i>   | 59/69                     | WP_058032795     |
| MrtE         | WP_180926948            | Benzoate-CoA ligase                                          | <i>Streptomyces</i> sp. CNZ279       | 72/79                     | WP_099885767     |
| MrtF         | WP_180926949            | NAD-dependent epimerase / dehydratase                        | <i>Streptomyces vitaminophilus</i>   | 79/85                     | WP_078500755     |
| MrtG         | WP_180926950            | FAD-dependent mono-oxygenase                                 | <i>Streptomyces vitaminophilus</i>   | 77/87                     | WP_018385507     |
| MrtH         | WP_180926951            | Methyltransferase                                            | <i>Streptomyces armeniacus</i>       | 71/83                     | AXK34857         |
| MrtI         | WP_180926952            | FAD-dependent oxidoreductase                                 | Unclassified <i>Streptomyces</i> sp. | 75/84                     | WP_099885772     |
| MrtJ         | WP_180928508            | Cytochrome P450                                              | <i>Streptomyces vitaminophilus</i>   | 76/86                     | WP_018385504     |
| MrtK         | WP_180926953            | Cytochrome P450                                              | <i>Streptomyces</i> sp. CNZ298       | 81/87                     | MBB6534452       |
| MrtL         | WP_180926954            | FtsX-like permease family protein                            | <i>Streptomyces</i> sp. CNZ298       | 79/80                     | WP_185018974     |
| MrtM         | WP_180926955            | ABC transporter ATP-binding protein                          | Unclassified <i>Streptomyces</i> sp. | 82/91                     | WP_099885768     |
| MrtN         | WP_180926956            | MFS transporter                                              | <i>Streptomyces</i> sp. Tu 3180      | 71/78                     | WP_159533361     |
| MrtO         | WP_180926957            | LysR family transcriptional regulator                        | <i>Streptomyces radiopugnans</i>     | 69/77                     | WP_093654096     |

**Figure S21.** Phylogenetic relatedness of select adenylate forming enzymes. MUSCLE<sup>1</sup> was used to create multiple sequence alignments. A) The neighbor-joining tree was constructed using aryl-CoA ligases involved in enterocin biosynthesis, EncN (accession number AAF81733); aurachin SS biosynthesis, SauE; aurachin RE biosynthesis, RauF; marinoterpin biosynthesis, mrtE; anthranilate CoA ligases (accession numbers ABE35671, AAL0206, AAL02069); 2,3-dihydroxybenzoate AMP ligase, DhbE (accession number AFV18074); 4-chlorobenzoyl-CoA ligase (accession number AAN10109); benzoate-CoA ligase (accession number ABE31536); aurachin biosynthesis, AuaE and AuaEII; 2,4-dihydroxyquinolone biosynthesis, PqsA (accession number WP\_003140754); pyochelin biosynthesis, PchD adenylation domain (accession number AAD55799). The scale bar indicates 0.1 changes per amino acid. B) Alignment of the adenylate-forming A10 core region of adenylate-forming enzymes.<sup>2</sup> The lysine residue essential for forming the adenylate intermediate is highlighted in red.

A)

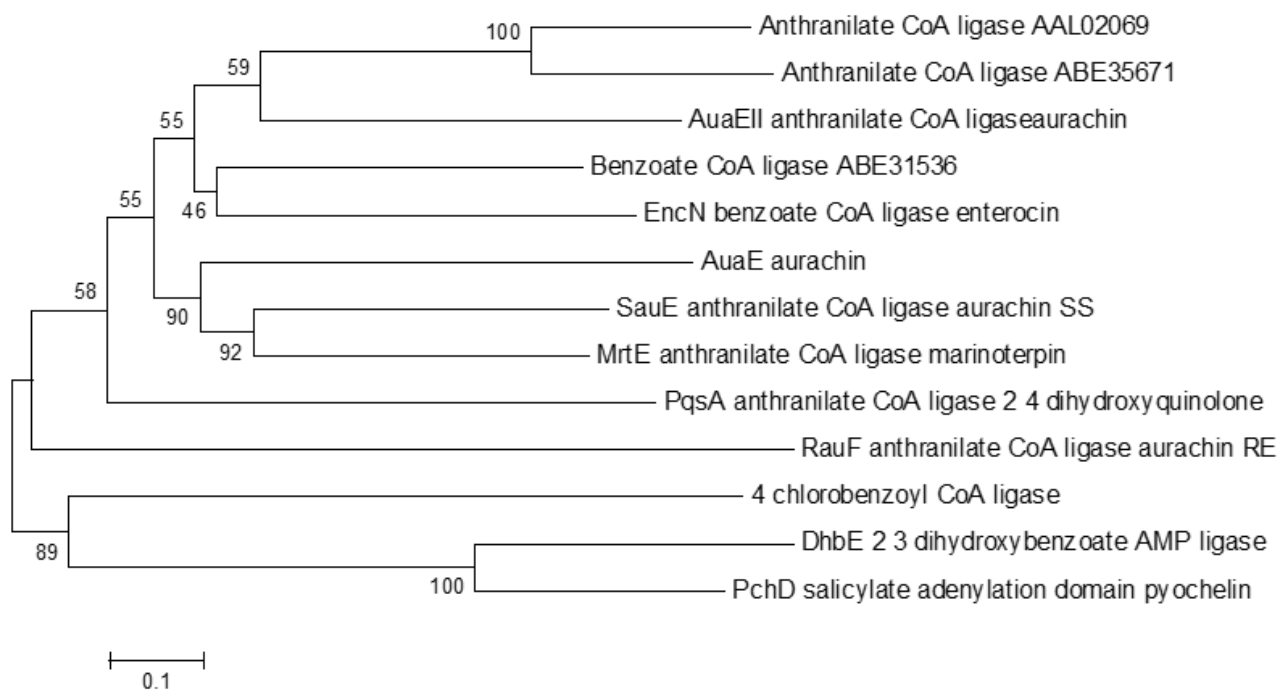

B)

|                                  |                                              |
|----------------------------------|----------------------------------------------|
| Anthranilate-CoA ligase_AAL02069 | PRAIEFRDSLPRTEETG <b>K</b> LQRFRLREGKP-----  |
| Anthranilate-CoA ligase_ABE35671 | PREIVFVDLTPRTETG <b>K</b> LKRFELRTIA-----    |
| SauE                             | PQTVRVVEELPVTSTG <b>K</b> TARHLIRREMEKQS---  |
| RauF                             | PDICVSVPRIPLTSTG <b>K</b> IDRGACHRLLARRVGSRL |
| DhbE                             | PDRIEFIESFPQTGVG <b>K</b> VSKKELRKVIAEKLITVK |
| 4-chlorobenzoyl-CoA ligase       | PKRYFILDQLPKNALN <b>K</b> VLRRLQLVQQVSS----- |
| Benzoate-CoA ligase_ABE31536     | PRDIVFVDDLPKTATG <b>K</b> IQRFKLREQS-----    |
| AuaE                             | PSKIEVLSGSAS-----                            |
| AuaEII                           | PRWIEFVTELPKTATG <b>K</b> IQRFKLRSAA-----    |
| EncN                             | PHLVEFAADLPKTP <b>K</b> IQRFALRSQETGKADAPA   |
| PqsA                             | PSQLHVLPALPRNDNG <b>K</b> LARAELRHLADTLYHDNL |
| PchD                             | PDRIELVPAFPQTGIG <b>K</b> ISKKDLRERLRRELEARA |
| MrtE                             | PRVLRVDDLPRATATG <b>K</b> IARHTLRAEAVAGAAAPT |

**Figure S22.** Phylogenetic relatedness of select polyprenyl synthases. MUSCLE<sup>1</sup> was used to create multiple sequence alignments. The neighbor-joining tree was constructed using the farnesyl diphosphate synthase involved in aurachin RE biosynthesis, RaulI (accession number WP\_052416887); geranyl/farnesyl diphosphate synthase involved in aurachin SS biosynthesis, SauI (accession number ARM20258); geranyl diphosphate synthase involved in napyradiomycin biosynthesis, NapT7 (accession number ABS50482); geranyl diphosphate synthase involved in furaquinocin biosynthesis (accession number ); geranyl diphosphate synthase involved in furaquinocin biosynthesis, Fur19 (accession number BAE78987); geranyl diphosphate synthase involved in furanonaphthoquinone biosynthesis, Fnq23 (accession number CAL34101); Mcl2 and Mcl22 involved in merochlorin biosynthesis (accession numbers AGH68887 and WP\_024888525); sesterterpene diphosphate synthase involved in marinoterpin biosynthesis, MrtP (accession number WP\_180926943); sesterterpene diphosphate synthase involved in atolypene biosynthesis, AtoC (Accession number WP\_063745200); sesterterpene diphosphate synthase involved in sestermobaraene biosynthesis(accession number WP\_004941318); StsA involved in somaliensene A and B biosynthesis (accession number WP\_078571316); StsB involved in somaliensene A and B biosynthesis (accession number WP\_010468026);farnesyl diphosphate synthase involved in BE-40644 biosynthesis, FdpS (accession number BAD07374); solanesyl diphosphate synthase (accession number XP\_002879508); undecaprenyl diphosphate synthases (accession numbers WP\_003640735 and O82827); geranylgeranyl diphosphate synthases (accession numbers NP\_001032354, XP\_003308874, XP\_003824547, XP\_004028673, XP\_009249955, CAD6651761, and XP\_003267333); farnesyl diphosphate synthases (accession numbers NP\_001129293, WP\_013069157, WP\_000183378, and XP\_001160391); and decaprenyl diphosphate synthase (accession number WP\_013068881). The scale bar indicates 0.2 changes/amino acid.

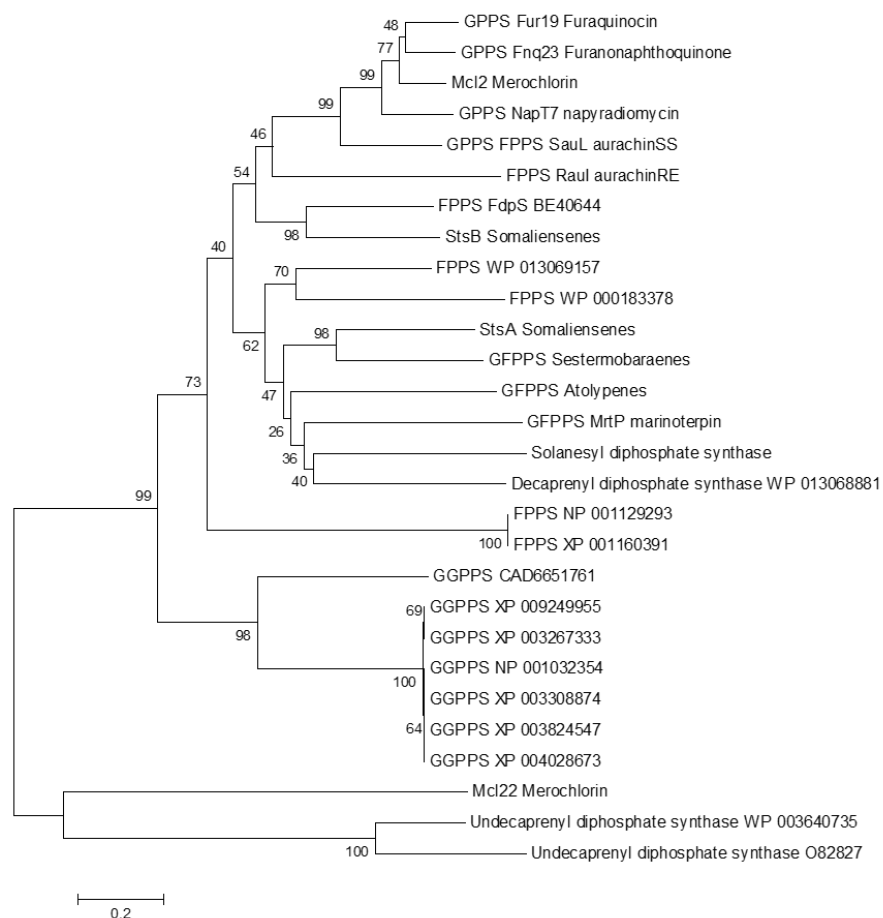

**Figure S23.** Phylogenetic relatedness of selected prenyltransferases. MUSCLE<sup>1</sup> was used to create multiple sequence alignments. The neighbor-joining tree was constructed using prenyltransferases involved in aurachin RE biosynthesis, RauB (accession number WP\_080726500); aurachin biosynthesis, AuaA (accession number CAL48953); aurachin SS biosynthesis, SauA (accession number WP\_176101155); marinoterpin biosynthesis, MrtA (accession number WP\_180926944); napyradiomycin biosynthesis, NapT8 and NapT9 (accession numbers ABS50489 and ABS50490); 4-hydroxybenzoate octaprenyltransferase, UbiA (accession number WP\_160799794); BE-40644 biosynthesis, (accession number BAD07390); furaquinocin biosynthesis, Fur7 (accession number BAE78988); furanonaphthoquinone biosynthesis, Fnq26 and Fnq (accession numbers A2AXG5 and CAL34106); merochlorin biosynthesis, Mcl23 (accession number AGH68908); and novobiocin biosynthesis, NovQ (accession number WP\_079127921). The scale bar indicates 0.2 changes per amino acid.

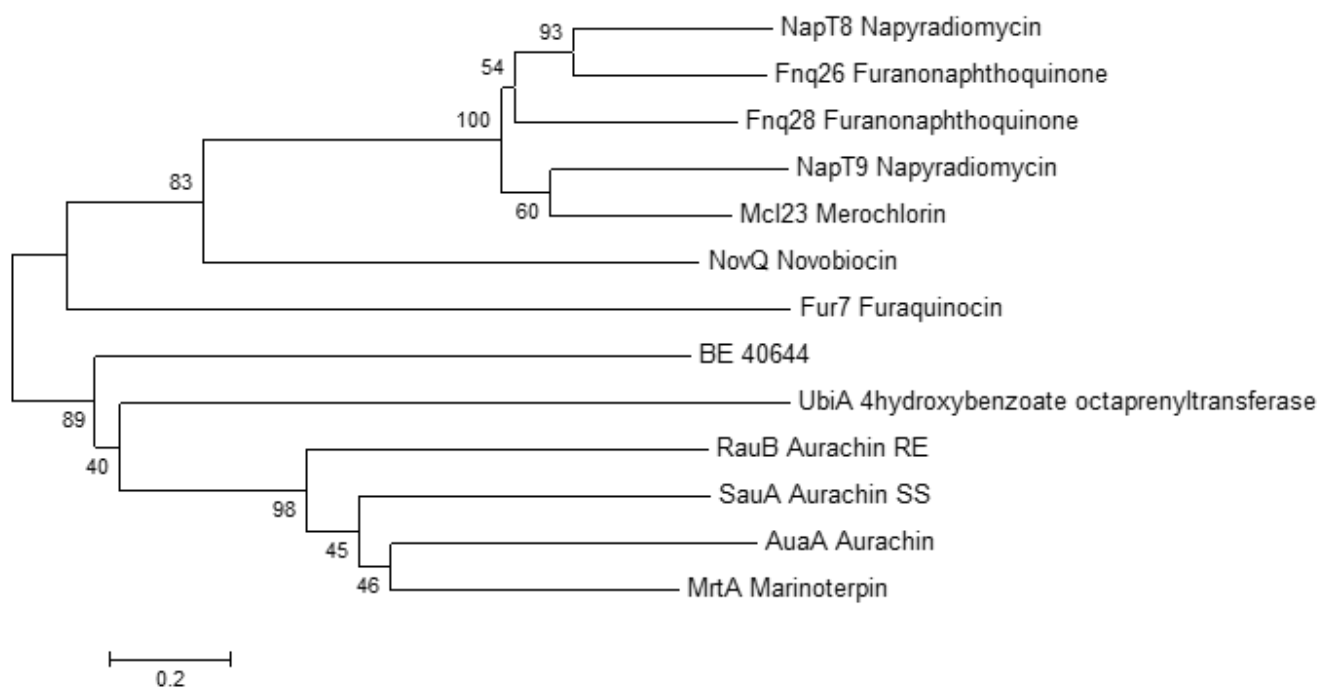

**Figure S24.** Phylogenetic relatedness of select flavin monooxygenases. MUSCLE<sup>1</sup> was used to create multiple sequence alignments. The neighbor-joining tree was constructed using flavin monooxygenases involved in valanimycin biosynthesis, VImH (accession number P96072); aurachin biosynthesis, AuaJ and AuaG (accession numbers CCD27752 and H1ZZA4, respectively); marinoterpin biosynthesis, MrtG (accession number WP\_0180926950); actinorhodin biosynthesis, ActVA (accession number WP\_011030043); rebeccamycin biosynthesis, RebC (PDB 2R0C\_A); starosporine biosynthesis, StaC (accession number ABI94390); and dimethylaniline *N*-oxide monooxygenases (accession numbers NP\_001452, NP\_001451, and NP\_002013). The scale bar indicates 0.2 changes per amino acid.

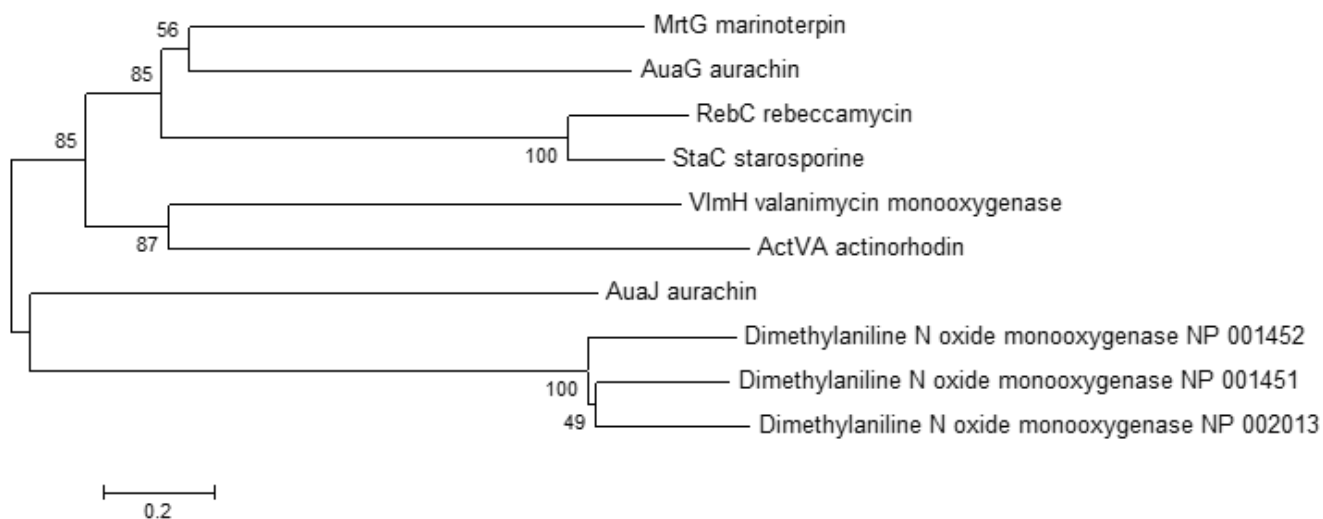

## References

1. Edgar, R. C. MUSCLE: a multiple sequence alignment method with reduced time and space complexity. *BMC bioinformatics*. 2004, 5, 113.
2. Pistorius, D., Li, Y., Mann, S., Müller, R. Unprecedented anthranilate priming involving two enzymes of the acyl adenylating superfamily in aurachin biosynthesis. *J Am Chem Soc*. 2011, 133, 12362.
